# Supplementary material for: Mining Data From Plasma Cell Differentiation Identified Novel Genes for Engineering of a Yeast Antibody Factory
Source: Front Bioeng Biotechnol. 2020 Mar 31;8:255. doi: 10.3389/fbioe.2020.00255 (PMC7136540; doi:10.3389/fbioe.2020.00255)
Supplement: TABLE S2 — Analysis of the yeast homologs in PC and PB phase and their GO-associations. [file Table_2.XLSX]

## Sheet: PC_phase
	Supplementary Table S2: Analysis of the yeast homologs and their GO-associations
GOID	GOTerm	Ontology Source	Term PValue	Term PValue Corrected with None	Group PValue	Group PValue Corrected with None	GOLevels	GOGroups	% Associated Genes	Nr. Genes	Cluster	Genes Cluster #1 (upregulated)	Genes Cluster #2 (downregulated)	%Genes Cluster #1	%Genes Cluster #2	Associated Genes Found
GO:0000038	very long-chain fatty acid metabolic process	GO_BiologicalProcess_23.05.2012_16h07	0.1	0.1	0.1	0.1	[5, 6, 8]	Group0	16.6667	1	Specific for Cluster #1	[YDL015C]	[]	100	0	[YDL015C]
GO:0000389	nuclear mRNA 3'-splice site recognition	GO_BiologicalProcess_23.05.2012_16h07	0.29	0.29	0.36	0.36	[7, 8, 9, 10, 11, 12, 13, 14]	Group1	5.26316	1	Specific for Cluster #2	[]	[YDR364C]	0	100	[YDR364C]
GO:0000348	nuclear mRNA branch site recognition	GO_BiologicalProcess_23.05.2012_16h07	0.15	0.15	0.36	0.36	[6, 7, 8, 9, 10, 11, 12, 13]	Group1	11.1111	1	Specific for Cluster #2	[]	[YDR364C]	0	100	[YDR364C]
GO:0015909	long-chain fatty acid transport	GO_BiologicalProcess_23.05.2012_16h07	0.21	0.21	0.21	0.21	[6, 7, 8, 9]	Group10	7.69231	1	Specific for Cluster #2	[]	[YGR037C]	0	100	[YGR037C]
GO:0006505	GPI anchor metabolic process	GO_BiologicalProcess_23.05.2012_16h07	0.00056	0.00056	0.00056	0.00056	[6, 7, 8]	Group11	7.84314	8	Specific for Cluster #1	[YDR331W, YHR188C, YJR013W, YKL165C, YLR088W, YPR183W]	[YGL142C, YPL076W]	75	25	[YDR331W, YGL142C, YHR188C, YJR013W, YKL165C, YLR088W, YPL076W, YPR183W]
GO:0006506	GPI anchor biosynthetic process	GO_BiologicalProcess_23.05.2012_16h07	0.00037	0.00037	0.00056	0.00056	[7, 8, 9]	Group11	8.33333	8	Specific for Cluster #1	[YDR331W, YHR188C, YJR013W, YKL165C, YLR088W, YPR183W]	[YGL142C, YPL076W]	75	25	[YDR331W, YGL142C, YHR188C, YJR013W, YKL165C, YLR088W, YPL076W, YPR183W]
GO:0016255	attachment of GPI anchor to protein	GO_BiologicalProcess_23.05.2012_16h07	0.0028	0.0028	0.00056	0.00056	[6, 8, 9, 10]	Group11	18.75	3	Specific for Cluster #1	[YDR331W, YHR188C, YLR088W]	[]	100	0	[YDR331W, YHR188C, YLR088W]
GO:0016479	negative regulation of transcription from RNA polymerase I promoter	GO_BiologicalProcess_23.05.2012_16h07	0.28	0.28	0.28	0.28	[6, 7, 8, 9, 10, 11]	Group12	5.55556	1	Specific for Cluster #2	[]	[YOL004W]	0	100	[YOL004W]
GO:0006975	DNA damage induced protein phosphorylation	GO_BiologicalProcess_23.05.2012_16h07	0.12	0.12	0.12	0.12	[5, 7]	Group13	14.2857	1	Specific for Cluster #2	[]	[YBR136W]	0	100	[YBR136W]
GO:0016572	histone phosphorylation	GO_BiologicalProcess_23.05.2012_16h07	0.12	0.12	0.12	0.12	[7, 10]	Group13	14.2857	1	Specific for Cluster #2	[]	[YBR136W]	0	100	[YBR136W]
GO:0016598	protein arginylation	GO_BiologicalProcess_23.05.2012_16h07	0.053	0.053	0.053	0.053	[6, 8, 9]	Group14	33.3333	1	Specific for Cluster #1	[YGL017W]	[]	100	0	[YGL017W]
GO:0017183	peptidyl-diphthamide biosynthetic process from peptidyl-histidine	GO_BiologicalProcess_23.05.2012_16h07	0.3	0.3	0.3	0.3	[4, 9]	Group15	5	1	Specific for Cluster #2	[]	[YKL191W]	0	100	[YKL191W]
GO:0017182	peptidyl-diphthamide metabolic process	GO_BiologicalProcess_23.05.2012_16h07	0.3	0.3	0.3	0.3	[8]	Group15	5	1	Specific for Cluster #2	[]	[YKL191W]	0	100	[YKL191W]
GO:0018198	peptidyl-cysteine modification	GO_BiologicalProcess_23.05.2012_16h07	0.053	0.053	0.053	0.053	[7]	Group16	33.3333	1	Specific for Cluster #1	[YDL205C]	[]	100	0	[YDL205C]
GO:0018160	peptidyl-pyrromethane cofactor linkage	GO_BiologicalProcess_23.05.2012_16h07	0.053	0.053	0.053	0.053	[7, 8]	Group16	33.3333	1	Specific for Cluster #1	[YDL205C]	[]	100	0	[YDL205C]
GO:0018196	peptidyl-asparagine modification	GO_BiologicalProcess_23.05.2012_16h07	0.029	0.029	0.029	0.029	[7]	Group17	13.3333	2	Specific for Cluster #1	[YEL002C, YJL002C]	[]	100	0	[YEL002C, YJL002C]
GO:0018279	protein N-linked glycosylation via asparagine	GO_BiologicalProcess_23.05.2012_16h07	0.029	0.029	0.029	0.029	[6, 7, 8]	Group17	13.3333	2	Specific for Cluster #1	[YEL002C, YJL002C]	[]	100	0	[YEL002C, YJL002C]
GO:0018344	protein geranylgeranylation	GO_BiologicalProcess_23.05.2012_16h07	0.24	0.24	0.24	0.24	[5, 7]	Group18	6.66667	1	Specific for Cluster #2	[]	[YPR176C]	0	100	[YPR176C]
GO:0019255	glucose 1-phosphate metabolic process	GO_BiologicalProcess_23.05.2012_16h07	0.019	0.019	0.019	0.019	[7]	Group19	16.6667	2	Specific for Cluster #1	[YEL058W, YMR278W]	[]	100	0	[YEL058W, YMR278W]
GO:0000390	spliceosomal complex disassembly	GO_BiologicalProcess_23.05.2012_16h07	0.29	0.29	0.29	0.29	[6, 7, 8, 9, 10, 11, 12]	Group2	5.26316	1	Specific for Cluster #2	[]	[YGL120C]	0	100	[YGL120C]
GO:0019346	transsulfuration	GO_BiologicalProcess_23.05.2012_16h07	0.25	0.25	0.29	0.29	[6, 8, 9]	Group20	6.25	1	Specific for Cluster #2	[]	[YGR155W]	0	100	[YGR155W]
GO:0006535	cysteine biosynthetic process from serine	GO_BiologicalProcess_23.05.2012_16h07	0.1	0.1	0.29	0.29	[6, 7, 8, 9, 10]	Group20	16.6667	1	Specific for Cluster #2	[]	[YGR155W]	0	100	[YGR155W]
GO:0019343	cysteine biosynthetic process via cystathionine	GO_BiologicalProcess_23.05.2012_16h07	0.16	0.16	0.29	0.29	[7, 8, 9, 10]	Group20	10	1	Specific for Cluster #2	[]	[YGR155W]	0	100	[YGR155W]
GO:0019673	GDP-mannose metabolic process	GO_BiologicalProcess_23.05.2012_16h07	0.1	0.1	0.01	0.01	[5, 6, 7]	Group21	16.6667	1	Specific for Cluster #1	[YDL055C]	[]	100	0	[YDL055C]
GO:0009298	GDP-mannose biosynthetic process	GO_BiologicalProcess_23.05.2012_16h07	0.1	0.1	0.01	0.01	[5, 6, 7, 8]	Group21	16.6667	1	Specific for Cluster #1	[YDL055C]	[]	100	0	[YDL055C]
GO:0019307	mannose biosynthetic process	GO_BiologicalProcess_23.05.2012_16h07	0.01	0.01	0.01	0.01	[6, 7]	Group21	22.2222	2	Specific for Cluster #1	[YDL055C, YFL045C]	[]	100	0	[YDL055C, YFL045C]
GO:0000710	meiotic mismatch repair	GO_BiologicalProcess_23.05.2012_16h07	0.085	0.085	0.031	0.031	[3, 4, 5, 6, 7, 8, 9]	Group22	5.26316	3	Specific for Cluster #1	[YBR088C, YDR097C, YMR167W]	[]	100	0	[YBR088C, YDR097C, YMR167W]
GO:0000713	meiotic heteroduplex formation	GO_BiologicalProcess_23.05.2012_16h07	0.053	0.053	0.031	0.031	[3, 4, 5, 6, 7, 8, 9]	Group22	33.3333	1	Specific for Cluster #1	[YMR167W]	[]	100	0	[YMR167W]
GO:0030491	heteroduplex formation	GO_BiologicalProcess_23.05.2012_16h07	0.027	0.027	0.031	0.031	[5, 6, 7]	Group22	8.33333	3	Specific for Cluster #2	[YMR167W]	[YAR007C, YER095W]	33.3333	66.6667	[YAR007C, YER095W, YMR167W]
GO:0042148	strand invasion	GO_BiologicalProcess_23.05.2012_16h07	0.25	0.25	0.031	0.031	[5, 6, 7, 8]	Group22	6.25	1	Specific for Cluster #2	[]	[YER095W]	0	100	[YER095W]
GO:0030497	fatty acid elongation	GO_BiologicalProcess_23.05.2012_16h07	0.19	0.19	0.19	0.19	[5, 6, 7, 8, 9]	Group23	8.33333	1	Specific for Cluster #1	[YJL196C]	[]	100	0	[YJL196C]
GO:0019368	fatty acid elongation, unsaturated fatty acid	GO_BiologicalProcess_23.05.2012_16h07	0.053	0.053	0.19	0.19	[6, 7, 8, 9, 10]	Group23	33.3333	1	Specific for Cluster #1	[YJL196C]	[]	100	0	[YJL196C]
GO:0000467	exonucleolytic trimming to generate mature 3'-end of 5.8S rRNA from tricistronic rRNA transcript (SSU-rRNA, 5.8S rRNA, LSU-rRNA)	GO_BiologicalProcess_23.05.2012_16h07	0.01	0.01	0.0083	0.0083	[8, 9, 10, 11, 12]	Group24	6.94444	5	Specific for Cluster #2	[YLR059C]	[YGR276C, YLR293C, YOL142W, YOR001W]	20	80	[YGR276C, YLR059C, YLR293C, YOL142W, YOR001W]
GO:0031125	rRNA 3'-end processing	GO_BiologicalProcess_23.05.2012_16h07	0.0071	0.0071	0.0083	0.0083	[7, 8, 9, 10]	Group24	6.45161	6	Specific for Cluster #2	[YLR059C]	[YGR214W, YGR276C, YLR293C, YOL142W, YOR001W]	16.6667	83.3333	[YGR214W, YGR276C, YLR059C, YLR293C, YOL142W, YOR001W]
GO:0000459	exonucleolytic trimming involved in rRNA processing	GO_BiologicalProcess_23.05.2012_16h07	0.012	0.012	0.0083	0.0083	[7, 8, 9, 10, 11]	Group24	6.66667	5	Specific for Cluster #2	[YLR059C]	[YGR276C, YLR293C, YOL142W, YOR001W]	20	80	[YGR276C, YLR059C, YLR293C, YOL142W, YOR001W]
GO:0072599	establishment of protein localization in endoplasmic reticulum	GO_BiologicalProcess_23.05.2012_16h07	0.0051	0.0051	0.0086	0.0086	[4, 5, 6, 7]	Group25	5.11364	9	Specific for Cluster #1	[YDR086C, YDR292C, YFL045C, YJL034W, YLR378C, YOL031C, YPL210C, YPL243W, YPR088C]	[]	100	0	[YDR086C, YDR292C, YFL045C, YJL034W, YLR378C, YOL031C, YPL210C, YPL243W, YPR088C]
GO:0030970	retrograde protein transport, ER to cytosol	GO_BiologicalProcess_23.05.2012_16h07	0.21	0.21	0.0086	0.0086	[5, 6, 7]	Group25	7.69231	1	Specific for Cluster #1	[YLR378C]	[]	100	0	[YLR378C]
GO:0045047	protein targeting to ER	GO_BiologicalProcess_23.05.2012_16h07	0.0051	0.0051	0.0086	0.0086	[5, 6, 7, 8]	Group25	5.11364	9	Specific for Cluster #1	[YDR086C, YDR292C, YFL045C, YJL034W, YLR378C, YOL031C, YPL210C, YPL243W, YPR088C]	[]	100	0	[YDR086C, YDR292C, YFL045C, YJL034W, YLR378C, YOL031C, YPL210C, YPL243W, YPR088C]
GO:0031204	posttranslational protein targeting to membrane, translocation	GO_BiologicalProcess_23.05.2012_16h07	0.025	0.025	0.0086	0.0086	[5, 6, 7, 8, 9, 10]	Group25	8.57143	3	Specific for Cluster #1	[YDR086C, YJL034W, YLR378C]	[]	100	0	[YDR086C, YJL034W, YLR378C]
GO:0006613	cotranslational protein targeting to membrane	GO_BiologicalProcess_23.05.2012_16h07	0.0002	0.0002	0.0086	0.0086	[7, 8, 9]	Group25	9.09091	8	Specific for Cluster #1	[YDR086C, YDR292C, YJL034W, YLR378C, YOL031C, YPL210C, YPL243W, YPR088C]	[]	100	0	[YDR086C, YDR292C, YJL034W, YLR378C, YOL031C, YPL210C, YPL243W, YPR088C]
GO:0006614	SRP-dependent cotranslational protein targeting to membrane	GO_BiologicalProcess_23.05.2012_16h07	0.00013	0.00013	0.0086	0.0086	[6, 7, 8, 9, 10]	Group25	9.63855	8	Specific for Cluster #1	[YDR086C, YDR292C, YJL034W, YLR378C, YOL031C, YPL210C, YPL243W, YPR088C]	[]	100	0	[YDR086C, YDR292C, YJL034W, YLR378C, YOL031C, YPL210C, YPL243W, YPR088C]
GO:0006616	SRP-dependent cotranslational protein targeting to membrane, translocation	GO_BiologicalProcess_23.05.2012_16h07	0.0064	0.0064	0.0086	0.0086	[5, 6, 7, 8, 9, 10, 11]	Group25	9.7561	4	Specific for Cluster #1	[YDR086C, YJL034W, YLR378C, YOL031C]	[]	100	0	[YDR086C, YJL034W, YLR378C, YOL031C]
GO:0006617	SRP-dependent cotranslational protein targeting to membrane, signal sequence recognition	GO_BiologicalProcess_23.05.2012_16h07	0.0047	0.0047	0.0086	0.0086	[6, 7, 8, 9, 10, 11]	Group25	15.7895	3	Specific for Cluster #1	[YPL210C, YPL243W, YPR088C]	[]	100	0	[YPL210C, YPL243W, YPR088C]
GO:0030037	actin filament reorganization involved in cell cycle	GO_BiologicalProcess_23.05.2012_16h07	0.029	0.029	0.07	0.07	[3, 4, 5, 8]	Group26	13.3333	2	Specific for Cluster #2	[YFL039C]	[YDR389W, YFL039C]	31.5465	63.093	[YDR389W, YFL039C]
GO:0031532	actin cytoskeleton reorganization	GO_BiologicalProcess_23.05.2012_16h07	0.07	0.07	0.07	0.07	[4, 7]	Group26	8.33333	2	Specific for Cluster #2	[YFL039C]	[YDR389W, YFL039C]	31.5465	63.093	[YDR389W, YFL039C]
GO:0000706	meiotic DNA double-strand break processing	GO_BiologicalProcess_23.05.2012_16h07	0.29	0.29	0.29	0.29	[3, 4, 5, 8, 9, 10]	Group27	5.26316	1	Specific for Cluster #1	[YOR033C]	[]	100	0	[YOR033C]
GO:0031292	gene conversion at mating-type locus, DNA double-strand break processing	GO_BiologicalProcess_23.05.2012_16h07	0.16	0.16	0.29	0.29	[3, 4, 5, 6, 7, 8, 9, 10]	Group27	10	1	Specific for Cluster #1	[YOR033C]	[]	100	0	[YOR033C]
GO:0000738	DNA catabolic process, exonucleolytic	GO_BiologicalProcess_23.05.2012_16h07	0.29	0.29	0.29	0.29	[6, 7, 8]	Group27	5.26316	1	Specific for Cluster #1	[YOR033C]	[]	100	0	[YOR033C]
GO:0031860	telomeric 3' overhang formation	GO_BiologicalProcess_23.05.2012_16h07	0.12	0.12	0.29	0.29	[6, 7, 8, 9]	Group27	14.2857	1	Specific for Cluster #1	[YOR033C]	[]	100	0	[YOR033C]
GO:0000729	DNA double-strand break processing	GO_BiologicalProcess_23.05.2012_16h07	0.29	0.29	0.29	0.29	[7, 8, 9]	Group27	5.26316	1	Specific for Cluster #1	[YOR033C]	[]	100	0	[YOR033C]
GO:0032011	ARF protein signal transduction	GO_BiologicalProcess_23.05.2012_16h07	0.13	0.13	0.13	0.13	[6, 7, 8]	Group28	5.55556	2	Specific for Cluster #1	[YDR170C, YJR031C]	[]	100	0	[YDR170C, YJR031C]
GO:0032012	regulation of ARF protein signal transduction	GO_BiologicalProcess_23.05.2012_16h07	0.13	0.13	0.13	0.13	[6, 7, 8, 9]	Group28	5.55556	2	Specific for Cluster #1	[YDR170C, YJR031C]	[]	100	0	[YDR170C, YJR031C]
GO:0032297	negative regulation of DNA-dependent DNA replication initiation	GO_BiologicalProcess_23.05.2012_16h07	0.053	0.053	0.053	0.053	[6, 7, 8, 9, 10, 11]	Group29	33.3333	1	Specific for Cluster #1	[YKL022C]	[]	100	0	[YKL022C]
GO:0009213	pyrimidine deoxyribonucleoside triphosphate catabolic process	GO_BiologicalProcess_23.05.2012_16h07	0.13	0.13	0.13	0.13	[8, 9, 10, 11, 12]	Group3	5.55556	2	Specific for Cluster #2	[]	[YBR252W, YJR069C]	0	100	[YBR252W, YJR069C]
GO:0009217	purine deoxyribonucleoside triphosphate catabolic process	GO_BiologicalProcess_23.05.2012_16h07	0.13	0.13	0.13	0.13	[8, 9, 10, 11, 12]	Group3	5.55556	2	Specific for Cluster #2	[]	[YBR252W, YJR069C]	0	100	[YBR252W, YJR069C]
GO:0006244	pyrimidine nucleotide catabolic process	GO_BiologicalProcess_23.05.2012_16h07	0.13	0.13	0.13	0.13	[6, 7, 8, 9]	Group3	5.55556	2	Specific for Cluster #2	[]	[YBR252W, YJR069C]	0	100	[YBR252W, YJR069C]
GO:0009264	deoxyribonucleotide catabolic process	GO_BiologicalProcess_23.05.2012_16h07	0.13	0.13	0.13	0.13	[6, 7, 8, 9]	Group3	5.55556	2	Specific for Cluster #2	[]	[YBR252W, YJR069C]	0	100	[YBR252W, YJR069C]
GO:0009151	purine deoxyribonucleotide metabolic process	GO_BiologicalProcess_23.05.2012_16h07	0.13	0.13	0.13	0.13	[6, 7, 8, 9, 10]	Group3	5.55556	2	Specific for Cluster #2	[]	[YBR252W, YJR069C]	0	100	[YBR252W, YJR069C]
GO:0009149	pyrimidine nucleoside triphosphate catabolic process	GO_BiologicalProcess_23.05.2012_16h07	0.13	0.13	0.13	0.13	[7, 8, 9, 10]	Group3	5.55556	2	Specific for Cluster #2	[]	[YBR252W, YJR069C]	0	100	[YBR252W, YJR069C]
GO:0009204	deoxyribonucleoside triphosphate catabolic process	GO_BiologicalProcess_23.05.2012_16h07	0.13	0.13	0.13	0.13	[7, 8, 9, 10]	Group3	5.55556	2	Specific for Cluster #2	[]	[YBR252W, YJR069C]	0	100	[YBR252W, YJR069C]
GO:0009155	purine deoxyribonucleotide catabolic process	GO_BiologicalProcess_23.05.2012_16h07	0.13	0.13	0.13	0.13	[7, 8, 9, 10, 11]	Group3	5.55556	2	Specific for Cluster #2	[]	[YBR252W, YJR069C]	0	100	[YBR252W, YJR069C]
GO:0009215	purine deoxyribonucleoside triphosphate metabolic process	GO_BiologicalProcess_23.05.2012_16h07	0.13	0.13	0.13	0.13	[7, 8, 9, 10, 11]	Group3	5.55556	2	Specific for Cluster #2	[]	[YBR252W, YJR069C]	0	100	[YBR252W, YJR069C]
GO:0009223	pyrimidine deoxyribonucleotide catabolic process	GO_BiologicalProcess_23.05.2012_16h07	0.13	0.13	0.13	0.13	[7, 8, 9, 10, 11]	Group3	5.55556	2	Specific for Cluster #2	[]	[YBR252W, YJR069C]	0	100	[YBR252W, YJR069C]
GO:0000734	gene conversion at mating-type locus, DNA repair synthesis	GO_BiologicalProcess_23.05.2012_16h07	0.18	0.18	0.048	0.048	[3, 4, 5, 6, 7, 8, 9, 10]	Group30	9.09091	1	Specific for Cluster #1	[YKL113C]	[]	100	0	[YKL113C]
GO:0000731	DNA synthesis involved in DNA repair	GO_BiologicalProcess_23.05.2012_16h07	0.29	0.29	0.048	0.048	[6, 7, 8]	Group30	5.26316	1	Specific for Cluster #1	[YKL113C]	[]	100	0	[YKL113C]
GO:0006286	base-excision repair, base-free sugar-phosphate removal	GO_BiologicalProcess_23.05.2012_16h07	0.053	0.053	0.048	0.048	[6, 7, 8, 9]	Group30	33.3333	1	Specific for Cluster #1	[YKL113C]	[]	100	0	[YKL113C]
GO:0033567	DNA replication, Okazaki fragment processing	GO_BiologicalProcess_23.05.2012_16h07	0.015	0.015	0.048	0.048	[5, 6, 7, 8, 9, 10, 11]	Group30	10.3448	3	Specific for Cluster #2	[YKL113C]	[YJR006W, YNL218W]	33.3333	66.6667	[YJR006W, YKL113C, YNL218W]
GO:0001109	promoter clearance during DNA-dependent transcription	GO_BiologicalProcess_23.05.2012_16h07	0.22	0.22	0.39	0.39	[5, 6, 7, 8, 9]	Group31	7.14286	1	Specific for Cluster #2	[]	[YIL143C]	0	100	[YIL143C]
GO:0033683	nucleotide-excision repair, DNA incision	GO_BiologicalProcess_23.05.2012_16h07	0.25	0.25	0.39	0.39	[6, 7, 8, 9]	Group31	6.25	1	Specific for Cluster #2	[]	[YIL143C]	0	100	[YIL143C]
GO:0001111	promoter clearance from RNA polymerase II promoter	GO_BiologicalProcess_23.05.2012_16h07	0.22	0.22	0.39	0.39	[6, 7, 8, 9, 10]	Group31	7.14286	1	Specific for Cluster #2	[]	[YIL143C]	0	100	[YIL143C]
GO:0034314	Arp2/3 complex-mediated actin nucleation	GO_BiologicalProcess_23.05.2012_16h07	0.19	0.19	0.19	0.19	[6, 7, 8, 9, 10, 11, 12, 13]	Group32	8.33333	1	Specific for Cluster #2	[]	[YDL029W]	0	100	[YDL029W]
GO:0046471	phosphatidylglycerol metabolic process	GO_BiologicalProcess_23.05.2012_16h07	0.017	0.017	0.0054	0.0054	[5, 6, 7]	Group33	10	3	Specific for Cluster #2	[]	[YCL004W, YGR046W, YPL206C]	0	100	[YCL004W, YGR046W, YPL206C]
GO:0046475	glycerophospholipid catabolic process	GO_BiologicalProcess_23.05.2012_16h07	0.019	0.019	0.0054	0.0054	[5, 6, 7]	Group33	16.6667	2	Specific for Cluster #2	[]	[YML059C, YPL206C]	0	100	[YML059C, YPL206C]
GO:0006655	phosphatidylglycerol biosynthetic process	GO_BiologicalProcess_23.05.2012_16h07	0.019	0.019	0.0054	0.0054	[6, 7, 8]	Group33	16.6667	2	Specific for Cluster #2	[]	[YCL004W, YGR046W]	0	100	[YCL004W, YGR046W]
GO:0032048	cardiolipin metabolic process	GO_BiologicalProcess_23.05.2012_16h07	0.07	0.07	0.0054	0.0054	[6, 7, 8]	Group33	8.33333	2	Specific for Cluster #2	[]	[YCL004W, YGR046W]	0	100	[YCL004W, YGR046W]
GO:0034478	phosphatidylglycerol catabolic process	GO_BiologicalProcess_23.05.2012_16h07	0.053	0.053	0.0054	0.0054	[6, 7, 8]	Group33	33.3333	1	Specific for Cluster #2	[]	[YPL206C]	0	100	[YPL206C]
GO:0034638	phosphatidylcholine catabolic process	GO_BiologicalProcess_23.05.2012_16h07	0.053	0.053	0.0054	0.0054	[6, 7, 8]	Group33	33.3333	1	Specific for Cluster #2	[]	[YML059C]	0	100	[YML059C]
GO:0032049	cardiolipin biosynthetic process	GO_BiologicalProcess_23.05.2012_16h07	0.01	0.01	0.0054	0.0054	[7, 8, 9]	Group33	22.2222	2	Specific for Cluster #2	[]	[YCL004W, YGR046W]	0	100	[YCL004W, YGR046W]
GO:0034627	de novo NAD biosynthetic process	GO_BiologicalProcess_23.05.2012_16h07	0.065	0.065	0.065	0.065	[9, 10, 11, 12]	Group34	8.69565	2	Specific for Cluster #2	[]	[YBL098W, YLR231C]	0	100	[YBL098W, YLR231C]
GO:0034354	de novo NAD biosynthetic process from tryptophan	GO_BiologicalProcess_23.05.2012_16h07	0.065	0.065	0.065	0.065	[10, 11, 12, 13]	Group34	8.69565	2	Specific for Cluster #2	[]	[YBL098W, YLR231C]	0	100	[YBL098W, YLR231C]
GO:0033967	box C/D snoRNA metabolic process	GO_BiologicalProcess_23.05.2012_16h07	0.13	0.13	0.13	0.13	[7, 8, 9]	Group35	5.55556	2	Specific for Cluster #2	[]	[YAL033W, YDL014W]	0	100	[YAL033W, YDL014W]
GO:0034963	box C/D snoRNA processing	GO_BiologicalProcess_23.05.2012_16h07	0.13	0.13	0.13	0.13	[7, 8, 9, 10]	Group35	5.55556	2	Specific for Cluster #2	[]	[YAL033W, YDL014W]	0	100	[YAL033W, YDL014W]
GO:0000494	box C/D snoRNA 3'-end processing	GO_BiologicalProcess_23.05.2012_16h07	0.1	0.1	0.13	0.13	[8, 9, 10, 11]	Group35	16.6667	1	Specific for Cluster #2	[]	[YDL014W]	0	100	[YDL014W]
GO:0000052	citrulline metabolic process	GO_BiologicalProcess_23.05.2012_16h07	0.071	0.071	0.071	0.071	[5, 7, 8]	Group36	25	1	Specific for Cluster #1	[YOL058W]	[]	100	0	[YOL058W]
GO:0000053	argininosuccinate metabolic process	GO_BiologicalProcess_23.05.2012_16h07	0.071	0.071	0.071	0.071	[5, 7, 8]	Group36	25	1	Specific for Cluster #1	[YOL058W]	[]	100	0	[YOL058W]
GO:0000715	nucleotide-excision repair, DNA damage recognition	GO_BiologicalProcess_23.05.2012_16h07	0.29	0.29	0.29	0.29	[6, 7, 8, 9]	Group37	5.26316	1	Specific for Cluster #2	[]	[YEL037C]	0	100	[YEL037C]
GO:0034969	histone arginine methylation	GO_BiologicalProcess_23.05.2012_16h07	0.053	0.053	0.053	0.053	[6, 7, 8, 9, 11]	Group38	33.3333	1	Specific for Cluster #1	[YBR133C]	[]	100	0	[YBR133C]
GO:0035437	maintenance of protein localization in endoplasmic reticulum	GO_BiologicalProcess_23.05.2012_16h07	0.046	0.046	0.046	0.046	[5, 6, 7]	Group39	10.5263	2	Specific for Cluster #1	[YBL040C, YCL001W]	[]	100	0	[YBL040C, YCL001W]
GO:0006621	protein retention in ER lumen	GO_BiologicalProcess_23.05.2012_16h07	0.046	0.046	0.046	0.046	[6, 7, 8]	Group39	10.5263	2	Specific for Cluster #1	[YBL040C, YCL001W]	[]	100	0	[YBL040C, YCL001W]
GO:0009448	gamma-aminobutyric acid metabolic process	GO_BiologicalProcess_23.05.2012_16h07	0.19	0.19	0.19	0.19	[4, 6, 7]	Group4	8.33333	1	Specific for Cluster #2	[]	[YGR019W]	0	100	[YGR019W]
GO:0009450	gamma-aminobutyric acid catabolic process	GO_BiologicalProcess_23.05.2012_16h07	0.19	0.19	0.19	0.19	[5, 6, 7, 8]	Group4	8.33333	1	Specific for Cluster #2	[]	[YGR019W]	0	100	[YGR019W]
GO:0035753	maintenance of DNA trinucleotide repeats	GO_BiologicalProcess_23.05.2012_16h07	0.19	0.19	0.19	0.19	[6, 7, 8]	Group40	8.33333	1	Specific for Cluster #1	[YCL016C]	[]	100	0	[YCL016C]
GO:0040031	snRNA modification	GO_BiologicalProcess_23.05.2012_16h07	0.036	0.036	0.036	0.036	[5, 6, 7, 8, 9]	Group41	7.5	3	Specific for Cluster #1	[YHR072W-A, YHR089C]	[YPL212C]	66.6667	33.3333	[YHR072W-A, YHR089C, YPL212C]
GO:0031120	snRNA pseudouridine synthesis	GO_BiologicalProcess_23.05.2012_16h07	0.036	0.036	0.036	0.036	[6, 7, 8, 9, 10]	Group41	7.5	3	Specific for Cluster #1	[YHR072W-A, YHR089C]	[YPL212C]	66.6667	33.3333	[YHR072W-A, YHR089C, YPL212C]
GO:0042219	cellular modified amino acid catabolic process	GO_BiologicalProcess_23.05.2012_16h07	0.24	0.24	0.24	0.24	[5, 6, 7, 8]	Group42	6.66667	1	Specific for Cluster #2	[]	[YFR044C]	0	100	[YFR044C]
GO:0006751	glutathione catabolic process	GO_BiologicalProcess_23.05.2012_16h07	0.19	0.19	0.24	0.24	[5, 6, 7, 8, 9]	Group42	8.33333	1	Specific for Cluster #2	[]	[YFR044C]	0	100	[YFR044C]
GO:0042256	mature ribosome assembly	GO_BiologicalProcess_23.05.2012_16h07	0.05	0.05	0.05	0.05	[7, 8]	Group43	10	2	None Specific Cluster	[YPR041W]	[YNL163C]	50	50	[YNL163C, YPR041W]
GO:0042262	DNA protection	GO_BiologicalProcess_23.05.2012_16h07	0.053	0.053	0.053	0.053	[4, 5, 6, 7]	Group44	33.3333	1	Specific for Cluster #1	[YML028W]	[]	100	0	[YML028W]
GO:0000481	maturation of 5S rRNA	GO_BiologicalProcess_23.05.2012_16h07	0.15	0.15	0.38	0.38	[7, 8, 9, 10]	Group45	11.1111	1	Specific for Cluster #2	[]	[YGR276C]	0	100	[YGR276C]
GO:0042779	tRNA 3'-trailer cleavage	GO_BiologicalProcess_23.05.2012_16h07	0.1	0.1	0.38	0.38	[6, 7, 8, 9, 10, 11]	Group45	16.6667	1	Specific for Cluster #2	[]	[YGR276C]	0	100	[YGR276C]
GO:0042780	tRNA 3'-end processing	GO_BiologicalProcess_23.05.2012_16h07	0.3	0.3	0.38	0.38	[7, 8, 9, 10]	Group45	5	1	Specific for Cluster #2	[]	[YGR276C]	0	100	[YGR276C]
GO:0002107	generation of mature 3'-end of 5S rRNA generated by RNA polymerase III	GO_BiologicalProcess_23.05.2012_16h07	0.053	0.053	0.38	0.38	[8, 9, 10, 11]	Group45	33.3333	1	Specific for Cluster #2	[]	[YGR276C]	0	100	[YGR276C]
GO:0034415	tRNA 3'-trailer cleavage, exonucleolytic	GO_BiologicalProcess_23.05.2012_16h07	0.053	0.053	0.38	0.38	[7, 8, 9, 10, 11, 12]	Group45	33.3333	1	Specific for Cluster #2	[]	[YGR276C]	0	100	[YGR276C]
GO:0045732	positive regulation of protein catabolic process	GO_BiologicalProcess_23.05.2012_16h07	0.1	0.1	0.1	0.1	[4, 5, 6, 7]	Group46	6.66667	2	Specific for Cluster #1	[YDL007W, YKL145W]	[]	100	0	[YDL007W, YKL145W]
GO:0042177	negative regulation of protein catabolic process	GO_BiologicalProcess_23.05.2012_16h07	0.071	0.071	0.075	0.075	[4, 5, 6, 7]	Group47	25	1	Specific for Cluster #1	[YBL057C]	[]	100	0	[YBL057C]
GO:0045861	negative regulation of proteolysis	GO_BiologicalProcess_23.05.2012_16h07	0.016	0.016	0.075	0.075	[5, 6, 7, 8]	Group47	18.1818	2	None Specific Cluster	[YBL057C]	[YGR132C]	50	50	[YBL057C, YGR132C]
GO:0032434	regulation of proteasomal ubiquitin-dependent protein catabolic process	GO_BiologicalProcess_23.05.2012_16h07	0.28	0.28	0.075	0.075	[6, 7, 8, 9, 10]	Group47	5.55556	1	Specific for Cluster #1	[YBL057C]	[]	100	0	[YBL057C]
GO:0032435	negative regulation of proteasomal ubiquitin-dependent protein catabolic process	GO_BiologicalProcess_23.05.2012_16h07	0.071	0.071	0.075	0.075	[5, 6, 7, 8, 9, 10, 11]	Group47	25	1	Specific for Cluster #1	[YBL057C]	[]	100	0	[YBL057C]
GO:0045903	positive regulation of translational fidelity	GO_BiologicalProcess_23.05.2012_16h07	0.0091	0.0091	0.0091	0.0091	[4, 6, 7, 8, 9, 10]	Group48	12.5	3	Specific for Cluster #2	[]	[YBR189W, YER025W, YGL123W]	0	100	[YBR189W, YER025W, YGL123W]
GO:0006172	ADP biosynthetic process	GO_BiologicalProcess_23.05.2012_16h07	0.13	0.13	0.13	0.13	[9, 10, 11, 12]	Group49	12.5	1	Specific for Cluster #2	[]	[YDR226W]	0	100	[YDR226W]
GO:0009135	purine nucleoside diphosphate metabolic process	GO_BiologicalProcess_23.05.2012_16h07	0.13	0.13	0.13	0.13	[6, 7, 8, 9]	Group49	12.5	1	Specific for Cluster #2	[]	[YDR226W]	0	100	[YDR226W]
GO:0009185	ribonucleoside diphosphate metabolic process	GO_BiologicalProcess_23.05.2012_16h07	0.13	0.13	0.13	0.13	[7, 8, 9]	Group49	12.5	1	Specific for Cluster #2	[]	[YDR226W]	0	100	[YDR226W]
GO:0009136	purine nucleoside diphosphate biosynthetic process	GO_BiologicalProcess_23.05.2012_16h07	0.13	0.13	0.13	0.13	[7, 8, 9, 10]	Group49	12.5	1	Specific for Cluster #2	[]	[YDR226W]	0	100	[YDR226W]
GO:0009179	purine ribonucleoside diphosphate metabolic process	GO_BiologicalProcess_23.05.2012_16h07	0.13	0.13	0.13	0.13	[7, 8, 9, 10]	Group49	12.5	1	Specific for Cluster #2	[]	[YDR226W]	0	100	[YDR226W]
GO:0009188	ribonucleoside diphosphate biosynthetic process	GO_BiologicalProcess_23.05.2012_16h07	0.13	0.13	0.13	0.13	[7, 8, 9, 10]	Group49	12.5	1	Specific for Cluster #2	[]	[YDR226W]	0	100	[YDR226W]
GO:0009180	purine ribonucleoside diphosphate biosynthetic process	GO_BiologicalProcess_23.05.2012_16h07	0.13	0.13	0.13	0.13	[8, 9, 10, 11]	Group49	12.5	1	Specific for Cluster #2	[]	[YDR226W]	0	100	[YDR226W]
GO:0046031	ADP metabolic process	GO_BiologicalProcess_23.05.2012_16h07	0.13	0.13	0.13	0.13	[8, 9, 10, 11]	Group49	12.5	1	Specific for Cluster #2	[]	[YDR226W]	0	100	[YDR226W]
GO:0000338	protein deneddylation	GO_BiologicalProcess_23.05.2012_16h07	0.29	0.29	0.29	0.29	[8]	Group5	5.26316	1	Specific for Cluster #1	[YDL147W]	[]	100	0	[YDL147W]
GO:0010388	cullin deneddylation	GO_BiologicalProcess_23.05.2012_16h07	0.29	0.29	0.29	0.29	[9]	Group5	5.26316	1	Specific for Cluster #1	[YDL147W]	[]	100	0	[YDL147W]
GO:0006241	CTP biosynthetic process	GO_BiologicalProcess_23.05.2012_16h07	0.19	0.19	0.19	0.19	[8, 9, 10, 11, 12]	Group50	8.33333	1	Specific for Cluster #1	[YBL039C]	[]	100	0	[YBL039C]
GO:0009208	pyrimidine ribonucleoside triphosphate metabolic process	GO_BiologicalProcess_23.05.2012_16h07	0.19	0.19	0.19	0.19	[7, 8, 9, 10]	Group50	8.33333	1	Specific for Cluster #1	[YBL039C]	[]	100	0	[YBL039C]
GO:0046036	CTP metabolic process	GO_BiologicalProcess_23.05.2012_16h07	0.19	0.19	0.19	0.19	[7, 8, 9, 10, 11]	Group50	8.33333	1	Specific for Cluster #1	[YBL039C]	[]	100	0	[YBL039C]
GO:0009209	pyrimidine ribonucleoside triphosphate biosynthetic process	GO_BiologicalProcess_23.05.2012_16h07	0.19	0.19	0.19	0.19	[8, 9, 10, 11]	Group50	8.33333	1	Specific for Cluster #1	[YBL039C]	[]	100	0	[YBL039C]
GO:0009177	pyrimidine deoxyribonucleoside monophosphate biosynthetic process	GO_BiologicalProcess_23.05.2012_16h07	0.1	0.1	0.1	0.1	[8, 9, 10, 11, 12]	Group51	16.6667	1	Specific for Cluster #1	[YOR074C]	[]	100	0	[YOR074C]
GO:0046073	dTMP metabolic process	GO_BiologicalProcess_23.05.2012_16h07	0.1	0.1	0.1	0.1	[8, 9, 10, 11, 12]	Group51	16.6667	1	Specific for Cluster #1	[YOR074C]	[]	100	0	[YOR074C]
GO:0006231	dTMP biosynthetic process	GO_BiologicalProcess_23.05.2012_16h07	0.1	0.1	0.1	0.1	[9, 10, 11, 12, 13]	Group51	16.6667	1	Specific for Cluster #1	[YOR074C]	[]	100	0	[YOR074C]
GO:0009162	deoxyribonucleoside monophosphate metabolic process	GO_BiologicalProcess_23.05.2012_16h07	0.1	0.1	0.1	0.1	[7, 8, 9]	Group51	16.6667	1	Specific for Cluster #1	[YOR074C]	[]	100	0	[YOR074C]
GO:0009157	deoxyribonucleoside monophosphate biosynthetic process	GO_BiologicalProcess_23.05.2012_16h07	0.1	0.1	0.1	0.1	[7, 8, 9, 10]	Group51	16.6667	1	Specific for Cluster #1	[YOR074C]	[]	100	0	[YOR074C]
GO:0009176	pyrimidine deoxyribonucleoside monophosphate metabolic process	GO_BiologicalProcess_23.05.2012_16h07	0.1	0.1	0.1	0.1	[7, 8, 9, 10, 11]	Group51	16.6667	1	Specific for Cluster #1	[YOR074C]	[]	100	0	[YOR074C]
GO:0006167	AMP biosynthetic process	GO_BiologicalProcess_23.05.2012_16h07	0.013	0.013	0.00026	0.00026	[9, 10, 11, 12]	Group52	20	2	Specific for Cluster #2	[]	[YJR105W, YML022W]	0	100	[YJR105W, YML022W]
GO:0046113	nucleobase catabolic process	GO_BiologicalProcess_23.05.2012_16h07	0.1	0.1	0.00026	0.00026	[5, 6, 7]	Group52	16.6667	1	Specific for Cluster #1	[YNL141W]	[]	100	0	[YNL141W]
GO:0009113	purine base biosynthetic process	GO_BiologicalProcess_23.05.2012_16h07	0.00012	0.00012	0.00026	0.00026	[4, 6, 7, 8]	Group52	13.9535	6	None Specific Cluster	[YKR080W, YMR300C, YNL141W]	[YGL234W, YGR204W, YML022W]	50	50	[YGL234W, YGR204W, YKR080W, YML022W, YMR300C, YNL141W]
GO:0043174	nucleoside salvage	GO_BiologicalProcess_23.05.2012_16h07	0.1	0.1	0.00026	0.00026	[5, 6, 7, 8]	Group52	6.45161	2	Specific for Cluster #2	[]	[YJR105W, YML022W]	0	100	[YJR105W, YML022W]
GO:0006145	purine base catabolic process	GO_BiologicalProcess_23.05.2012_16h07	0.053	0.053	0.00026	0.00026	[6, 7, 8]	Group52	33.3333	1	Specific for Cluster #1	[YNL141W]	[]	100	0	[YNL141W]
GO:0043096	purine base salvage	GO_BiologicalProcess_23.05.2012_16h07	0.037	0.037	0.00026	0.00026	[5, 6, 7, 8, 9]	Group52	11.7647	2	None Specific Cluster	[YNL141W]	[YML022W]	50	50	[YML022W, YNL141W]
GO:0046083	adenine metabolic process	GO_BiologicalProcess_23.05.2012_16h07	0.037	0.037	0.00026	0.00026	[6, 7, 8]	Group52	11.7647	2	None Specific Cluster	[YNL141W]	[YML022W]	50	50	[YML022W, YNL141W]
GO:0046100	hypoxanthine metabolic process	GO_BiologicalProcess_23.05.2012_16h07	0.1	0.1	0.00026	0.00026	[6, 7, 8]	Group52	16.6667	1	Specific for Cluster #1	[YNL141W]	[]	100	0	[YNL141W]
GO:0046084	adenine biosynthetic process	GO_BiologicalProcess_23.05.2012_16h07	0.22	0.22	0.00026	0.00026	[5, 7, 8, 9]	Group52	7.14286	1	Specific for Cluster #2	[]	[YML022W]	0	100	[YML022W]
GO:0046101	hypoxanthine biosynthetic process	GO_BiologicalProcess_23.05.2012_16h07	0.053	0.053	0.00026	0.00026	[5, 7, 8, 9]	Group52	33.3333	1	Specific for Cluster #1	[YNL141W]	[]	100	0	[YNL141W]
GO:0006146	adenine catabolic process	GO_BiologicalProcess_23.05.2012_16h07	0.053	0.053	0.00026	0.00026	[7, 8, 9]	Group52	33.3333	1	Specific for Cluster #1	[YNL141W]	[]	100	0	[YNL141W]
GO:0006166	purine ribonucleoside salvage	GO_BiologicalProcess_23.05.2012_16h07	0.1	0.1	0.00026	0.00026	[6, 7, 8, 9, 10]	Group52	6.45161	2	Specific for Cluster #2	[]	[YJR105W, YML022W]	0	100	[YJR105W, YML022W]
GO:0006168	adenine salvage	GO_BiologicalProcess_23.05.2012_16h07	0.18	0.18	0.00026	0.00026	[6, 7, 8, 9, 10]	Group52	9.09091	1	Specific for Cluster #2	[]	[YML022W]	0	100	[YML022W]
GO:0043103	hypoxanthine salvage	GO_BiologicalProcess_23.05.2012_16h07	0.053	0.053	0.00026	0.00026	[6, 7, 8, 9, 10]	Group52	33.3333	1	Specific for Cluster #1	[YNL141W]	[]	100	0	[YNL141W]
GO:0046033	AMP metabolic process	GO_BiologicalProcess_23.05.2012_16h07	0.013	0.013	0.00026	0.00026	[8, 9, 10, 11]	Group52	20	2	Specific for Cluster #2	[]	[YJR105W, YML022W]	0	100	[YJR105W, YML022W]
GO:0031338	regulation of vesicle fusion	GO_BiologicalProcess_23.05.2012_16h07	0.092	0.092	0.1	0.1	[4, 5, 6, 7]	Group53	7.14286	2	Specific for Cluster #2	[]	[YDR080W, YGL095C]	0	100	[YDR080W, YGL095C]
GO:0031340	positive regulation of vesicle fusion	GO_BiologicalProcess_23.05.2012_16h07	0.16	0.16	0.1	0.1	[3, 4, 5, 6, 7, 8]	Group53	10	1	Specific for Cluster #2	[]	[YGL095C]	0	100	[YGL095C]
GO:0035493	SNARE complex assembly	GO_BiologicalProcess_23.05.2012_16h07	0.092	0.092	0.1	0.1	[5, 6, 7]	Group53	7.14286	2	Specific for Cluster #2	[]	[YDR080W, YGL095C]	0	100	[YDR080W, YGL095C]
GO:0035542	regulation of SNARE complex assembly	GO_BiologicalProcess_23.05.2012_16h07	0.075	0.075	0.1	0.1	[4, 5, 6, 7, 8]	Group53	8	2	Specific for Cluster #2	[]	[YDR080W, YGL095C]	0	100	[YDR080W, YGL095C]
GO:0048210	Golgi vesicle fusion to target membrane	GO_BiologicalProcess_23.05.2012_16h07	0.053	0.053	0.1	0.1	[5, 6, 7]	Group53	33.3333	1	Specific for Cluster #2	[]	[YGL095C]	0	100	[YGL095C]
GO:0035543	positive regulation of SNARE complex assembly	GO_BiologicalProcess_23.05.2012_16h07	0.12	0.12	0.1	0.1	[4, 5, 6, 7, 8, 9]	Group53	14.2857	1	Specific for Cluster #2	[]	[YGL095C]	0	100	[YGL095C]
GO:0035494	SNARE complex disassembly	GO_BiologicalProcess_23.05.2012_16h07	0.3	0.3	0.17	0.17	[4, 5, 7]	Group54	5	1	Specific for Cluster #1	[YBR080C]	[]	100	0	[YBR080C]
GO:0048280	vesicle fusion with Golgi apparatus	GO_BiologicalProcess_23.05.2012_16h07	0.1	0.1	0.17	0.17	[5, 6, 7]	Group54	6.45161	2	Specific for Cluster #1	[YBR080C, YLR026C]	[]	100	0	[YBR080C, YLR026C]
GO:0051316	attachment of spindle microtubules to kinetochore involved in meiotic chromosome segregation	GO_BiologicalProcess_23.05.2012_16h07	0.053	0.053	0.053	0.053	[3, 4, 5, 6, 7, 8, 9, 10]	Group55	33.3333	1	Specific for Cluster #2	[]	[YPL204W]	0	100	[YPL204W]
GO:0051455	attachment of spindle microtubules to kinetochore involved in homologous chromosome segregation	GO_BiologicalProcess_23.05.2012_16h07	0.053	0.053	0.053	0.053	[4, 5, 6, 7, 8, 9, 10, 11]	Group55	33.3333	1	Specific for Cluster #2	[]	[YPL204W]	0	100	[YPL204W]
GO:0015868	purine ribonucleotide transport	GO_BiologicalProcess_23.05.2012_16h07	0.19	0.19	0.19	0.19	[5, 6, 7]	Group56	8.33333	1	Specific for Cluster #1	[YKL165C]	[]	100	0	[YKL165C]
GO:0051503	adenine nucleotide transport	GO_BiologicalProcess_23.05.2012_16h07	0.19	0.19	0.19	0.19	[5, 6, 7]	Group56	8.33333	1	Specific for Cluster #1	[YKL165C]	[]	100	0	[YKL165C]
GO:0015867	ATP transport	GO_BiologicalProcess_23.05.2012_16h07	0.19	0.19	0.19	0.19	[6, 7, 8]	Group56	8.33333	1	Specific for Cluster #1	[YKL165C]	[]	100	0	[YKL165C]
GO:0030834	regulation of actin filament depolymerization	GO_BiologicalProcess_23.05.2012_16h07	0.26	0.26	0.1	0.1	[4, 5, 6, 7, 8, 9, 10]	Group57	5.88235	1	Specific for Cluster #2	[]	[YIL034C]	0	100	[YIL034C]
GO:0030835	negative regulation of actin filament depolymerization	GO_BiologicalProcess_23.05.2012_16h07	0.26	0.26	0.1	0.1	[4, 5, 6, 7, 8, 9, 10, 11]	Group57	5.88235	1	Specific for Cluster #2	[]	[YIL034C]	0	100	[YIL034C]
GO:0030042	actin filament depolymerization	GO_BiologicalProcess_23.05.2012_16h07	0.1	0.1	0.1	0.1	[6, 8, 9]	Group57	6.66667	2	Specific for Cluster #2	[]	[YIL034C, YMR092C]	0	100	[YIL034C, YMR092C]
GO:0051693	actin filament capping	GO_BiologicalProcess_23.05.2012_16h07	0.26	0.26	0.1	0.1	[5, 6, 7, 8, 9, 10, 11, 12]	Group57	5.88235	1	Specific for Cluster #2	[]	[YIL034C]	0	100	[YIL034C]
GO:0051016	barbed-end actin filament capping	GO_BiologicalProcess_23.05.2012_16h07	0.26	0.26	0.1	0.1	[6, 7, 8, 9, 10, 11, 12, 13]	Group57	5.88235	1	Specific for Cluster #2	[]	[YIL034C]	0	100	[YIL034C]
GO:0006874	cellular calcium ion homeostasis	GO_BiologicalProcess_23.05.2012_16h07	0.075	0.075	0.075	0.075	[7, 9]	Group58	8	2	Specific for Cluster #1	[YBR127C, YEL031W]	[]	100	0	[YBR127C, YEL031W]
GO:0055074	calcium ion homeostasis	GO_BiologicalProcess_23.05.2012_16h07	0.075	0.075	0.075	0.075	[8]	Group58	8	2	Specific for Cluster #1	[YBR127C, YEL031W]	[]	100	0	[YBR127C, YEL031W]
GO:0070125	mitochondrial translational elongation	GO_BiologicalProcess_23.05.2012_16h07	0.12	0.12	0.12	0.12	[6, 7]	Group59	14.2857	1	Specific for Cluster #1	[YOR187W]	[]	100	0	[YOR187W]
GO:0010390	histone monoubiquitination	GO_BiologicalProcess_23.05.2012_16h07	0.15	0.15	0.15	0.15	[8, 10, 11]	Group6	11.1111	1	Specific for Cluster #2	[]	[YDL074C]	0	100	[YDL074C]
GO:0070126	mitochondrial translational termination	GO_BiologicalProcess_23.05.2012_16h07	0.053	0.053	0.053	0.053	[6, 7, 8]	Group60	33.3333	1	Specific for Cluster #1	[YGL143C]	[]	100	0	[YGL143C]
GO:0006422	aspartyl-tRNA aminoacylation	GO_BiologicalProcess_23.05.2012_16h07	0.016	0.016	0.016	0.016	[6, 7, 9, 10, 11]	Group61	18.1818	2	None Specific Cluster	[YPL104W]	[YLL018C]	50	50	[YLL018C, YPL104W]
GO:0070146	mitochondrial aspartyl-tRNA aminoacylation	GO_BiologicalProcess_23.05.2012_16h07	0.053	0.053	0.016	0.016	[6, 7, 8, 10, 11, 12]	Group61	33.3333	1	Specific for Cluster #1	[YPL104W]	[]	100	0	[YPL104W]
GO:0006437	tyrosyl-tRNA aminoacylation	GO_BiologicalProcess_23.05.2012_16h07	0.12	0.12	0.12	0.12	[6, 7, 9, 10, 11]	Group62	14.2857	1	Specific for Cluster #2	[]	[YPL097W]	0	100	[YPL097W]
GO:0070184	mitochondrial tyrosyl-tRNA aminoacylation	GO_BiologicalProcess_23.05.2012_16h07	0.053	0.053	0.12	0.12	[6, 7, 8, 10, 11, 12]	Group62	33.3333	1	Specific for Cluster #2	[]	[YPL097W]	0	100	[YPL097W]
GO:0070601	centromeric sister chromatid cohesion	GO_BiologicalProcess_23.05.2012_16h07	0.053	0.053	0.29	0.29	[4, 5, 7]	Group63	33.3333	1	Specific for Cluster #1	[YOR014W]	[]	100	0	[YOR014W]
GO:0051754	meiotic sister chromatid cohesion, centromeric	GO_BiologicalProcess_23.05.2012_16h07	0.053	0.053	0.29	0.29	[5, 6, 7, 8, 9, 10]	Group63	33.3333	1	Specific for Cluster #1	[YOR014W]	[]	100	0	[YOR014W]
GO:0031578	mitotic cell cycle spindle orientation checkpoint	GO_BiologicalProcess_23.05.2012_16h07	0.29	0.29	0.29	0.29	[7, 8, 9, 10, 11]	Group63	5.26316	1	Specific for Cluster #1	[YOR014W]	[]	100	0	[YOR014W]
GO:0070681	glutaminyl-tRNAGln biosynthesis via transamidation	GO_BiologicalProcess_23.05.2012_16h07	0.16	0.16	0.16	0.16	[6, 8, 9, 10]	Group64	10	1	Specific for Cluster #2	[]	[YBL080C]	0	100	[YBL080C]
GO:0070940	dephosphorylation of RNA polymerase II C-terminal domain	GO_BiologicalProcess_23.05.2012_16h07	0.19	0.19	0.19	0.19	[7, 8, 9, 10, 11]	Group65	8.33333	1	Specific for Cluster #2	[]	[YMR277W]	0	100	[YMR277W]
GO:0071031	nuclear mRNA surveillance of mRNA 3'-end processing	GO_BiologicalProcess_23.05.2012_16h07	0.1	0.1	0.13	0.13	[9, 10, 11]	Group66	6.45161	2	Specific for Cluster #2	[]	[YIL079C, YOR001W]	0	100	[YIL079C, YOR001W]
GO:0071036	nuclear polyadenylation-dependent snoRNA catabolic process	GO_BiologicalProcess_23.05.2012_16h07	0.065	0.065	0.13	0.13	[8, 9, 10, 11, 12]	Group66	8.69565	2	Specific for Cluster #2	[]	[YIL079C, YOR001W]	0	100	[YIL079C, YOR001W]
GO:0071037	nuclear polyadenylation-dependent snRNA catabolic process	GO_BiologicalProcess_23.05.2012_16h07	0.065	0.065	0.13	0.13	[8, 9, 10, 11, 12]	Group66	8.69565	2	Specific for Cluster #2	[]	[YIL079C, YOR001W]	0	100	[YIL079C, YOR001W]
GO:0071040	nuclear polyadenylation-dependent antisense transcript catabolic process	GO_BiologicalProcess_23.05.2012_16h07	0.18	0.18	0.13	0.13	[8, 9, 10, 11, 12]	Group66	9.09091	1	Specific for Cluster #2	[]	[YOR001W]	0	100	[YOR001W]
GO:0008334	histone mRNA metabolic process	GO_BiologicalProcess_23.05.2012_16h07	0.24	0.24	0.13	0.13	[6, 7, 8]	Group66	6.66667	1	Specific for Cluster #2	[]	[YOR001W]	0	100	[YOR001W]
GO:0016076	snRNA catabolic process	GO_BiologicalProcess_23.05.2012_16h07	0.065	0.065	0.13	0.13	[7, 8, 9]	Group66	8.69565	2	Specific for Cluster #2	[]	[YIL079C, YOR001W]	0	100	[YIL079C, YOR001W]
GO:0016077	snoRNA catabolic process	GO_BiologicalProcess_23.05.2012_16h07	0.065	0.065	0.13	0.13	[7, 8, 9]	Group66	8.69565	2	Specific for Cluster #2	[]	[YIL079C, YOR001W]	0	100	[YIL079C, YOR001W]
GO:0071044	histone mRNA catabolic process	GO_BiologicalProcess_23.05.2012_16h07	0.24	0.24	0.13	0.13	[7, 8, 9, 10]	Group66	6.66667	1	Specific for Cluster #2	[]	[YOR001W]	0	100	[YOR001W]
GO:0071049	nuclear retention of pre-mRNA with aberrant 3'-ends at the site of transcription	GO_BiologicalProcess_23.05.2012_16h07	0.25	0.25	0.13	0.13	[6, 10, 11, 12]	Group66	6.25	1	Specific for Cluster #2	[]	[YOR001W]	0	100	[YOR001W]
GO:0070199	establishment of protein localization to chromosome	GO_BiologicalProcess_23.05.2012_16h07	0.3	0.3	0.3	0.3	[4, 5, 6, 7]	Group67	5	1	Specific for Cluster #2	[]	[YDR180W]	0	100	[YDR180W]
GO:0071169	establishment of protein localization to chromatin	GO_BiologicalProcess_23.05.2012_16h07	0.3	0.3	0.3	0.3	[5, 6, 7, 8]	Group67	5	1	Specific for Cluster #2	[]	[YDR180W]	0	100	[YDR180W]
GO:0043102	amino acid salvage	GO_BiologicalProcess_23.05.2012_16h07	0.092	0.092	0.14	0.14	[5, 6, 7, 8]	Group68	7.14286	2	Specific for Cluster #2	[]	[YEL038W, YPR118W]	0	100	[YEL038W, YPR118W]
GO:0071265	L-methionine biosynthetic process	GO_BiologicalProcess_23.05.2012_16h07	0.14	0.14	0.14	0.14	[7, 8, 9, 10]	Group68	5.40541	2	Specific for Cluster #2	[]	[YEL038W, YPR118W]	0	100	[YEL038W, YPR118W]
GO:0019509	L-methionine salvage from methylthioadenosine	GO_BiologicalProcess_23.05.2012_16h07	0.092	0.092	0.14	0.14	[6, 7, 8, 9, 10, 11, 12]	Group68	7.14286	2	Specific for Cluster #2	[]	[YEL038W, YPR118W]	0	100	[YEL038W, YPR118W]
GO:0071267	L-methionine salvage	GO_BiologicalProcess_23.05.2012_16h07	0.1	0.1	0.14	0.14	[8, 9, 10, 11]	Group68	6.45161	2	Specific for Cluster #2	[]	[YEL038W, YPR118W]	0	100	[YEL038W, YPR118W]
GO:0000200	inactivation of MAPK activity involved in cell wall biogenesis	GO_BiologicalProcess_23.05.2012_16h07	0.21	0.21	0.41	0.41	[7, 8, 9, 10, 11, 12, 13, 14]	Group69	7.69231	1	Specific for Cluster #2	[]	[YNL053W]	0	100	[YNL053W]
GO:0071511	inactivation of MAPK activity involved in conjugation with cellular fusion	GO_BiologicalProcess_23.05.2012_16h07	0.12	0.12	0.41	0.41	[7, 8, 9, 10, 11, 12, 13, 14]	Group69	14.2857	1	Specific for Cluster #2	[]	[YNL053W]	0	100	[YNL053W]
GO:0010969	regulation of pheromone-dependent signal transduction involved in conjugation with cellular fusion	GO_BiologicalProcess_23.05.2012_16h07	0.29	0.29	0.41	0.41	[4, 5, 6, 7, 8]	Group69	5.26316	1	Specific for Cluster #2	[]	[YNL053W]	0	100	[YNL053W]
GO:0046825	regulation of protein export from nucleus	GO_BiologicalProcess_23.05.2012_16h07	0.1	0.1	0.41	0.41	[6, 7, 8, 9]	Group69	16.6667	1	Specific for Cluster #2	[]	[YNL053W]	0	100	[YNL053W]
GO:0045204	MAPK export from nucleus	GO_BiologicalProcess_23.05.2012_16h07	0.1	0.1	0.41	0.41	[7, 8, 9]	Group69	16.6667	1	Specific for Cluster #2	[]	[YNL053W]	0	100	[YNL053W]
GO:0071701	regulation of MAPK export from nucleus	GO_BiologicalProcess_23.05.2012_16h07	0.1	0.1	0.41	0.41	[7, 8, 9, 10]	Group69	16.6667	1	Specific for Cluster #2	[]	[YNL053W]	0	100	[YNL053W]
GO:0015680	intracellular copper ion transport	GO_BiologicalProcess_23.05.2012_16h07	0.3	0.3	0.3	0.3	[4, 5, 8, 9]	Group7	5	1	Specific for Cluster #1	[YHR175W]	[]	100	0	[YHR175W]
GO:0072671	mitochondria-associated protein catabolic process	GO_BiologicalProcess_23.05.2012_16h07	0.15	0.15	0.15	0.15	[8, 9, 10]	Group70	11.1111	1	Specific for Cluster #2	[]	[YDR049W]	0	100	[YDR049W]
GO:1900864	mitochondrial RNA modification	GO_BiologicalProcess_23.05.2012_16h07	0.25	0.25	0.097	0.097	[5, 6, 7, 8]	Group71	6.25	1	Specific for Cluster #2	[]	[YDL104C]	0	100	[YDL104C]
GO:0046085	adenosine metabolic process	GO_BiologicalProcess_23.05.2012_16h07	0.097	0.097	0.097	0.097	[7, 8, 9]	Group71	6.89655	2	Specific for Cluster #2	[]	[YDL104C, YKR038C]	0	100	[YDL104C, YKR038C]
GO:0070900	mitochondrial tRNA modification	GO_BiologicalProcess_23.05.2012_16h07	0.25	0.25	0.097	0.097	[6, 7, 8, 9, 10, 11]	Group71	6.25	1	Specific for Cluster #2	[]	[YDL104C]	0	100	[YDL104C]
GO:0070525	threonylcarbamoyladenosine metabolic process	GO_BiologicalProcess_23.05.2012_16h07	0.097	0.097	0.097	0.097	[8, 9, 10]	Group71	6.89655	2	Specific for Cluster #2	[]	[YDL104C, YKR038C]	0	100	[YDL104C, YKR038C]
GO:0072670	mitochondrial tRNA threonylcarbamoyladenosine modification	GO_BiologicalProcess_23.05.2012_16h07	0.053	0.053	0.097	0.097	[7, 8, 9, 10, 11, 12]	Group71	33.3333	1	Specific for Cluster #2	[]	[YDL104C]	0	100	[YDL104C]
GO:2001173	regulation of histone H2B conserved C-terminal lysine ubiquitination	GO_BiologicalProcess_23.05.2012_16h07	0.26	0.26	0.38	0.38	[8, 9, 10, 11, 12, 13]	Group72	5.88235	1	Specific for Cluster #1	[YOR123C]	[]	100	0	[YOR123C]
GO:0071894	histone H2B conserved C-terminal lysine ubiquitination	GO_BiologicalProcess_23.05.2012_16h07	0.26	0.26	0.38	0.38	[9, 11, 12]	Group72	5.88235	1	Specific for Cluster #1	[YOR123C]	[]	100	0	[YOR123C]
GO:0018023	peptidyl-lysine trimethylation	GO_BiologicalProcess_23.05.2012_16h07	0.3	0.3	0.38	0.38	[6, 7, 9]	Group72	5	1	Specific for Cluster #1	[YOR123C]	[]	100	0	[YOR123C]
GO:0033182	regulation of histone ubiquitination	GO_BiologicalProcess_23.05.2012_16h07	0.3	0.3	0.38	0.38	[6, 7, 8, 9, 10, 11]	Group72	5	1	Specific for Cluster #1	[YOR123C]	[]	100	0	[YOR123C]
GO:2001166	regulation of histone H2B ubiquitination	GO_BiologicalProcess_23.05.2012_16h07	0.26	0.26	0.38	0.38	[7, 8, 9, 10, 11, 12]	Group72	5.88235	1	Specific for Cluster #1	[YOR123C]	[]	100	0	[YOR123C]
GO:0033523	histone H2B ubiquitination	GO_BiologicalProcess_23.05.2012_16h07	0.26	0.26	0.38	0.38	[8, 10, 11]	Group72	5.88235	1	Specific for Cluster #1	[YOR123C]	[]	100	0	[YOR123C]
GO:0080182	histone H3-K4 trimethylation	GO_BiologicalProcess_23.05.2012_16h07	0.1	0.1	0.38	0.38	[7, 8, 9, 10, 11, 13]	Group72	16.6667	1	Specific for Cluster #1	[YOR123C]	[]	100	0	[YOR123C]
GO:0001731	formation of translation preinitiation complex	GO_BiologicalProcess_23.05.2012_16h07	0.15	0.15	0.036	0.036	[3, 6, 7]	Group73	11.1111	1	Specific for Cluster #2	[]	[YCR077C]	0	100	[YCR077C]
GO:0000290	deadenylation-dependent decapping of nuclear-transcribed mRNA	GO_BiologicalProcess_23.05.2012_16h07	0.025	0.025	0.036	0.036	[8, 9, 10, 11]	Group73	8.57143	3	Specific for Cluster #1	[YJL124C, YOR173W]	[YCR077C]	66.6667	33.3333	[YCR077C, YJL124C, YOR173W]
GO:0006047	UDP-N-acetylglucosamine metabolic process	GO_BiologicalProcess_23.05.2012_16h07	0.0081	0.0081	0.0081	0.0081	[5, 6, 9]	Group74	13.0435	3	Specific for Cluster #1	[YDL103C, YEL058W, YFL017C]	[]	100	0	[YDL103C, YEL058W, YFL017C]
GO:0006041	glucosamine metabolic process	GO_BiologicalProcess_23.05.2012_16h07	0.0081	0.0081	0.0081	0.0081	[7]	Group74	13.0435	3	Specific for Cluster #1	[YDL103C, YEL058W, YFL017C]	[]	100	0	[YDL103C, YEL058W, YFL017C]
GO:0006042	glucosamine biosynthetic process	GO_BiologicalProcess_23.05.2012_16h07	0.0081	0.0081	0.0081	0.0081	[7, 8]	Group74	13.0435	3	Specific for Cluster #1	[YDL103C, YEL058W, YFL017C]	[]	100	0	[YDL103C, YEL058W, YFL017C]
GO:0006044	N-acetylglucosamine metabolic process	GO_BiologicalProcess_23.05.2012_16h07	0.0081	0.0081	0.0081	0.0081	[8]	Group74	13.0435	3	Specific for Cluster #1	[YDL103C, YEL058W, YFL017C]	[]	100	0	[YDL103C, YEL058W, YFL017C]
GO:0006048	UDP-N-acetylglucosamine biosynthetic process	GO_BiologicalProcess_23.05.2012_16h07	0.0081	0.0081	0.0081	0.0081	[6, 7, 9, 10]	Group74	13.0435	3	Specific for Cluster #1	[YDL103C, YEL058W, YFL017C]	[]	100	0	[YDL103C, YEL058W, YFL017C]
GO:0006045	N-acetylglucosamine biosynthetic process	GO_BiologicalProcess_23.05.2012_16h07	0.0081	0.0081	0.0081	0.0081	[8, 9]	Group74	13.0435	3	Specific for Cluster #1	[YDL103C, YEL058W, YFL017C]	[]	100	0	[YDL103C, YEL058W, YFL017C]
GO:0006086	acetyl-CoA biosynthetic process from pyruvate	GO_BiologicalProcess_23.05.2012_16h07	0.19	0.19	0.19	0.19	[7, 8]	Group75	8.33333	1	Specific for Cluster #1	[YER178W]	[]	100	0	[YER178W]
GO:0006106	fumarate metabolic process	GO_BiologicalProcess_23.05.2012_16h07	0.12	0.12	0.12	0.12	[7]	Group76	14.2857	1	Specific for Cluster #1	[YPL262W]	[]	100	0	[YPL262W]
GO:0006189	'de novo' IMP biosynthetic process	GO_BiologicalProcess_23.05.2012_16h07	0.0032	0.0032	6.6e-05	6.6e-05	[10, 11, 12, 13]	Group77	11.7647	4	None Specific Cluster	[YLR359W, YMR300C]	[YGL234W, YOR128C]	50	50	[YGL234W, YLR359W, YMR300C, YOR128C]
GO:0006144	purine base metabolic process	GO_BiologicalProcess_23.05.2012_16h07	6e-05	6e-05	6.6e-05	6.6e-05	[5, 6, 7]	Group77	10.8108	8	Specific for Cluster #2	[YKR080W, YMR300C, YNL141W]	[YGL234W, YGR204W, YJR105W, YML022W, YOR128C]	37.5	62.5	[YGL234W, YGR204W, YJR105W, YKR080W, YML022W, YMR300C, YNL141W, YOR128C]
GO:0009113	purine base biosynthetic process	GO_BiologicalProcess_23.05.2012_16h07	0.00012	0.00012	6.6e-05	6.6e-05	[4, 6, 7, 8]	Group77	13.9535	6	None Specific Cluster	[YKR080W, YMR300C, YNL141W]	[YGL234W, YGR204W, YML022W]	50	50	[YGL234W, YGR204W, YKR080W, YML022W, YMR300C, YNL141W]
GO:0043096	purine base salvage	GO_BiologicalProcess_23.05.2012_16h07	0.037	0.037	6.6e-05	6.6e-05	[5, 6, 7, 8, 9]	Group77	11.7647	2	None Specific Cluster	[YNL141W]	[YML022W]	50	50	[YML022W, YNL141W]
GO:0046083	adenine metabolic process	GO_BiologicalProcess_23.05.2012_16h07	0.037	0.037	6.6e-05	6.6e-05	[6, 7, 8]	Group77	11.7647	2	None Specific Cluster	[YNL141W]	[YML022W]	50	50	[YML022W, YNL141W]
GO:0006264	mitochondrial DNA replication	GO_BiologicalProcess_23.05.2012_16h07	0.24	0.24	0.24	0.24	[6, 7, 8, 9]	Group78	6.66667	1	Specific for Cluster #2	[]	[YOR330C]	0	100	[YOR330C]
GO:0000084	S phase of mitotic cell cycle	GO_BiologicalProcess_23.05.2012_16h07	0.00016	0.00016	9.8e-09	9.8e-09	[5, 6, 7]	Group79	10.9375	7	Specific for Cluster #1	[YBR202W, YEL032W, YGL201C, YLR103C, YLR274W, YPR019W]	[YBL023C]	85.7143	14.2857	[YBL023C, YBR202W, YEL032W, YGL201C, YLR103C, YLR274W, YPR019W]
GO:0022616	DNA strand elongation	GO_BiologicalProcess_23.05.2012_16h07	9.2e-06	9.2e-06	9.8e-09	9.8e-09	[5, 6, 7]	Group79	8.02469	13	Specific for Cluster #1	[YBR087W, YBR088C, YBR202W, YEL032W, YGL201C, YJR068W, YKL113C, YOL006C, YOR033C, YPR019W]	[YBL023C, YJR006W, YNL218W]	76.9231	23.0769	[YBL023C, YBR087W, YBR088C, YBR202W, YEL032W, YGL201C, YJR006W, YJR068W, YKL113C, YNL218W, YOL006C, YOR033C, YPR019W]
GO:0032392	DNA geometric change	GO_BiologicalProcess_23.05.2012_16h07	0.0027	0.0027	9.8e-09	9.8e-09	[6, 7, 8]	Group79	9.43396	5	Specific for Cluster #1	[YBR202W, YGL201C, YPR019W]	[YAR007C, YDR190C]	60	40	[YAR007C, YBR202W, YDR190C, YGL201C, YPR019W]
GO:0006267	pre-replicative complex assembly	GO_BiologicalProcess_23.05.2012_16h07	5.3e-07	5.3e-07	9.8e-09	9.8e-09	[6, 7, 8, 9]	Group79	16.6667	9	Specific for Cluster #1	[YBR202W, YEL032W, YGL201C, YLR103C, YLR274W, YML065W, YPR019W]	[YBL023C, YBR060C]	77.7778	22.2222	[YBL023C, YBR060C, YBR202W, YEL032W, YGL201C, YLR103C, YLR274W, YML065W, YPR019W]
GO:0006271	DNA strand elongation involved in DNA replication	GO_BiologicalProcess_23.05.2012_16h07	2.9e-05	2.9e-05	9.8e-09	9.8e-09	[6, 7, 8, 9]	Group79	7.74194	12	Specific for Cluster #1	[YBR087W, YBR088C, YBR202W, YEL032W, YGL201C, YJR068W, YKL113C, YOL006C, YPR019W]	[YBL023C, YJR006W, YNL218W]	75	25	[YBL023C, YBR087W, YBR088C, YBR202W, YEL032W, YGL201C, YJR006W, YJR068W, YKL113C, YNL218W, YOL006C, YPR019W]
GO:0032508	DNA duplex unwinding	GO_BiologicalProcess_23.05.2012_16h07	0.0014	0.0014	9.8e-09	9.8e-09	[7, 8, 9]	Group79	10.8696	5	Specific for Cluster #1	[YBR202W, YGL201C, YPR019W]	[YAR007C, YDR190C]	60	40	[YAR007C, YBR202W, YDR190C, YGL201C, YPR019W]
GO:0006268	DNA unwinding involved in replication	GO_BiologicalProcess_23.05.2012_16h07	0.0026	0.0026	9.8e-09	9.8e-09	[7, 8, 9, 10]	Group79	12.5	4	Specific for Cluster #1	[YBR202W, YGL201C, YPR019W]	[YAR007C]	75	25	[YAR007C, YBR202W, YGL201C, YPR019W]
GO:0000727	double-strand break repair via break-induced replication	GO_BiologicalProcess_23.05.2012_16h07	2.8e-07	2.8e-07	9.8e-09	9.8e-09	[8, 9, 10]	Group79	13.4146	11	Specific for Cluster #1	[YBR202W, YEL032W, YGL201C, YLR103C, YLR274W, YOL146W, YPR019W]	[YBL023C, YJL072C, YMR284W, YPR135W]	63.6364	36.3636	[YBL023C, YBR202W, YEL032W, YGL201C, YJL072C, YLR103C, YLR274W, YMR284W, YOL146W, YPR019W, YPR135W]
GO:0015781	pyrimidine nucleotide-sugar transport	GO_BiologicalProcess_23.05.2012_16h07	0.15	0.15	0.15	0.15	[4, 5, 6, 7]	Group8	11.1111	1	Specific for Cluster #1	[YPL244C]	[]	100	0	[YPL244C]
GO:0015785	UDP-galactose transport	GO_BiologicalProcess_23.05.2012_16h07	0.053	0.053	0.15	0.15	[5, 6, 7, 8]	Group8	33.3333	1	Specific for Cluster #1	[YPL244C]	[]	100	0	[YPL244C]
GO:0015786	UDP-glucose transport	GO_BiologicalProcess_23.05.2012_16h07	0.15	0.15	0.15	0.15	[5, 6, 7, 8]	Group8	11.1111	1	Specific for Cluster #1	[YPL244C]	[]	100	0	[YPL244C]
GO:0006290	pyrimidine dimer repair	GO_BiologicalProcess_23.05.2012_16h07	0.053	0.053	0.053	0.053	[6, 7, 8]	Group80	33.3333	1	Specific for Cluster #1	[YOR386W]	[]	100	0	[YOR386W]
GO:0000719	photoreactive repair	GO_BiologicalProcess_23.05.2012_16h07	0.053	0.053	0.053	0.053	[7, 8, 9]	Group80	33.3333	1	Specific for Cluster #1	[YOR386W]	[]	100	0	[YOR386W]
GO:0006361	transcription initiation from RNA polymerase I promoter	GO_BiologicalProcess_23.05.2012_16h07	0.24	0.24	0.24	0.24	[6, 7, 8, 9, 10]	Group81	6.66667	1	Specific for Cluster #2	[]	[YKL125W]	0	100	[YKL125W]
GO:0001180	transcription initiation from RNA polymerase I promoter for nuclear large rRNA transcript	GO_BiologicalProcess_23.05.2012_16h07	0.087	0.087	0.24	0.24	[7, 8, 9, 10, 11]	Group81	20	1	Specific for Cluster #2	[]	[YKL125W]	0	100	[YKL125W]
GO:0006386	termination of RNA polymerase III transcription	GO_BiologicalProcess_23.05.2012_16h07	0.071	0.071	0.071	0.071	[6, 7, 8, 9, 10]	Group82	25	1	Specific for Cluster #2	[]	[YDR045C]	0	100	[YDR045C]
GO:0000301	retrograde transport, vesicle recycling within Golgi	GO_BiologicalProcess_23.05.2012_16h07	0.3	0.3	0.3	0.3	[6, 7]	Group83	5	1	Specific for Cluster #1	[YER157W]	[]	100	0	[YER157W]
GO:0000394	RNA splicing, via endonucleolytic cleavage and ligation	GO_BiologicalProcess_23.05.2012_16h07	0.14	0.14	0.14	0.14	[6, 7, 8, 9]	Group84	5.40541	2	Specific for Cluster #2	[]	[YAR008W, YLR105C]	0	100	[YAR008W, YLR105C]
GO:0000379	tRNA-type intron splice site recognition and cleavage	GO_BiologicalProcess_23.05.2012_16h07	0.019	0.019	0.14	0.14	[5, 6, 7, 8, 9, 10, 11]	Group84	16.6667	2	Specific for Cluster #2	[]	[YAR008W, YLR105C]	0	100	[YAR008W, YLR105C]
GO:0006388	tRNA splicing, via endonucleolytic cleavage and ligation	GO_BiologicalProcess_23.05.2012_16h07	0.14	0.14	0.14	0.14	[7, 8, 9, 10]	Group84	5.40541	2	Specific for Cluster #2	[]	[YAR008W, YLR105C]	0	100	[YAR008W, YLR105C]
GO:0006419	alanyl-tRNA aminoacylation	GO_BiologicalProcess_23.05.2012_16h07	0.12	0.12	0.12	0.12	[6, 7, 9, 10, 11]	Group85	14.2857	1	Specific for Cluster #2	[]	[YNL040W]	0	100	[YNL040W]
GO:0006429	leucyl-tRNA aminoacylation	GO_BiologicalProcess_23.05.2012_16h07	0.1	0.1	0.1	0.1	[6, 7, 9, 10, 11]	Group86	16.6667	1	Specific for Cluster #2	[]	[YLR382C]	0	100	[YLR382C]
GO:0006431	methionyl-tRNA aminoacylation	GO_BiologicalProcess_23.05.2012_16h07	0.18	0.18	0.18	0.18	[6, 7, 9, 10, 11]	Group87	9.09091	1	Specific for Cluster #2	[]	[YGR171C]	0	100	[YGR171C]
GO:0006432	phenylalanyl-tRNA aminoacylation	GO_BiologicalProcess_23.05.2012_16h07	0.16	0.16	0.16	0.16	[6, 7, 9, 10, 11]	Group88	10	1	Specific for Cluster #1	[YFL022C]	[]	100	0	[YFL022C]
GO:0006436	tryptophanyl-tRNA aminoacylation	GO_BiologicalProcess_23.05.2012_16h07	0.3	0.3	0.3	0.3	[6, 7, 9, 10, 11]	Group89	5	1	Specific for Cluster #1	[YOL097C]	[]	100	0	[YOL097C]
GO:0015809	arginine transport	GO_BiologicalProcess_23.05.2012_16h07	0.1	0.1	0.1	0.1	[7, 8, 9]	Group9	16.6667	1	Specific for Cluster #1	[YJL059W]	[]	100	0	[YJL059W]
GO:0006487	protein N-linked glycosylation	GO_BiologicalProcess_23.05.2012_16h07	2.2e-05	2.2e-05	2.2e-05	2.2e-05	[5, 6, 7]	Group90	7.94702	12	Specific for Cluster #1	[YBL082C, YBR070C, YBR110W, YBR243C, YEL002C, YGL022W, YGR036C, YJL002C, YOR067C, YOR103C, YPL227C, YPR183W]	[]	100	0	[YBL082C, YBR070C, YBR110W, YBR243C, YEL002C, YGL022W, YGR036C, YJL002C, YOR067C, YOR103C, YPL227C, YPR183W]
GO:0006488	dolichol-linked oligosaccharide biosynthetic process	GO_BiologicalProcess_23.05.2012_16h07	0.0054	0.0054	2.2e-05	2.2e-05	[5, 6, 7, 8]	Group90	10.2564	4	Specific for Cluster #1	[YBL082C, YBR070C, YBR110W, YOR067C]	[]	100	0	[YBL082C, YBR070C, YBR110W, YOR067C]
GO:0006490	oligosaccharide-lipid intermediate biosynthetic process	GO_BiologicalProcess_23.05.2012_16h07	0.004	0.004	2.2e-05	2.2e-05	[4, 5, 6, 7, 8, 9]	Group90	16.6667	3	Specific for Cluster #1	[YBL082C, YBR110W, YOR067C]	[]	100	0	[YBL082C, YBR110W, YOR067C]
GO:0006563	L-serine metabolic process	GO_BiologicalProcess_23.05.2012_16h07	0.004	0.004	0.029	0.029	[5, 7, 8]	Group91	11.1111	4	None Specific Cluster	[YGR208W, YLR058C]	[YFL018C, YGR155W]	50	50	[YFL018C, YGR155W, YGR208W, YLR058C]
GO:0006573	valine metabolic process	GO_BiologicalProcess_23.05.2012_16h07	0.12	0.12	0.029	0.029	[5, 7, 8]	Group91	14.2857	1	Specific for Cluster #2	[]	[YFL018C]	0	100	[YFL018C]
GO:0006103	2-oxoglutarate metabolic process	GO_BiologicalProcess_23.05.2012_16h07	0.25	0.25	0.029	0.029	[7]	Group91	6.25	1	Specific for Cluster #2	[]	[YFL018C]	0	100	[YFL018C]
GO:0006546	glycine catabolic process	GO_BiologicalProcess_23.05.2012_16h07	0.26	0.26	0.029	0.029	[6, 7, 8, 9]	Group91	5.88235	1	Specific for Cluster #2	[]	[YFL018C]	0	100	[YFL018C]
GO:0006550	isoleucine catabolic process	GO_BiologicalProcess_23.05.2012_16h07	0.12	0.12	0.029	0.029	[6, 7, 8, 9]	Group91	14.2857	1	Specific for Cluster #2	[]	[YFL018C]	0	100	[YFL018C]
GO:0006552	leucine catabolic process	GO_BiologicalProcess_23.05.2012_16h07	0.25	0.25	0.029	0.029	[6, 7, 8, 9]	Group91	6.25	1	Specific for Cluster #2	[]	[YFL018C]	0	100	[YFL018C]
GO:0006564	L-serine biosynthetic process	GO_BiologicalProcess_23.05.2012_16h07	0.046	0.046	0.029	0.029	[6, 7, 8, 9]	Group91	10.5263	2	None Specific Cluster	[YGR208W]	[YFL018C]	50	50	[YFL018C, YGR208W]
GO:0006574	valine catabolic process	GO_BiologicalProcess_23.05.2012_16h07	0.12	0.12	0.029	0.029	[6, 7, 8, 9]	Group91	14.2857	1	Specific for Cluster #2	[]	[YFL018C]	0	100	[YFL018C]
GO:0045338	farnesyl diphosphate metabolic process	GO_BiologicalProcess_23.05.2012_16h07	0.0011	0.0011	0.00046	0.00046	[4, 5, 6, 7]	Group92	25	3	Specific for Cluster #2	[YJL167W]	[YMR208W, YPL117C]	33.3333	66.6667	[YJL167W, YMR208W, YPL117C]
GO:0006696	ergosterol biosynthetic process	GO_BiologicalProcess_23.05.2012_16h07	0.0015	0.0015	0.00046	0.00046	[5, 6, 7]	Group92	7.52688	7	Specific for Cluster #2	[YGR175C, YJL167W]	[YHR190W, YLR100W, YML075C, YMR202W, YMR208W]	28.5714	71.4286	[YGR175C, YHR190W, YJL167W, YLR100W, YML075C, YMR202W, YMR208W]
GO:0009240	isopentenyl diphosphate biosynthetic process	GO_BiologicalProcess_23.05.2012_16h07	0.01	0.01	0.00046	0.00046	[5, 6, 7]	Group92	22.2222	2	Specific for Cluster #2	[]	[YML075C, YMR208W]	0	100	[YML075C, YMR208W]
GO:0016091	prenol biosynthetic process	GO_BiologicalProcess_23.05.2012_16h07	0.0071	0.0071	0.00046	0.00046	[5, 6, 7]	Group92	13.6364	3	Specific for Cluster #2	[YJL167W]	[YMR208W, YPL117C]	33.3333	66.6667	[YJL167W, YMR208W, YPL117C]
GO:0006695	cholesterol biosynthetic process	GO_BiologicalProcess_23.05.2012_16h07	0.0011	0.0011	0.00046	0.00046	[6, 7]	Group92	25	3	Specific for Cluster #2	[YJL167W]	[YHR190W, YML075C]	33.3333	66.6667	[YHR190W, YJL167W, YML075C]
GO:0045337	farnesyl diphosphate biosynthetic process	GO_BiologicalProcess_23.05.2012_16h07	0.0011	0.0011	0.00046	0.00046	[5, 6, 7, 8]	Group92	25	3	Specific for Cluster #2	[YJL167W]	[YMR208W, YPL117C]	33.3333	66.6667	[YJL167W, YMR208W, YPL117C]
GO:0019287	isopentenyl diphosphate biosynthetic process, mevalonate pathway	GO_BiologicalProcess_23.05.2012_16h07	0.01	0.01	0.00046	0.00046	[6, 7, 8]	Group92	22.2222	2	Specific for Cluster #2	[]	[YML075C, YMR208W]	0	100	[YML075C, YMR208W]
GO:0033865	nucleoside bisphosphate metabolic process	GO_BiologicalProcess_23.05.2012_16h07	0.092	0.092	0.00046	0.00046	[6, 7, 8]	Group92	7.14286	2	Specific for Cluster #2	[]	[YDR196C, YML075C]	0	100	[YDR196C, YML075C]
GO:0015936	coenzyme A metabolic process	GO_BiologicalProcess_23.05.2012_16h07	0.092	0.092	0.00046	0.00046	[5, 7, 8, 9]	Group92	7.14286	2	Specific for Cluster #2	[]	[YDR196C, YML075C]	0	100	[YDR196C, YML075C]
GO:0010142	farnesyl diphosphate biosynthetic process, mevalonate pathway	GO_BiologicalProcess_23.05.2012_16h07	0.1	0.1	0.00046	0.00046	[6, 7, 8, 9]	Group92	16.6667	1	Specific for Cluster #2	[]	[YMR208W]	0	100	[YMR208W]
GO:0006750	glutathione biosynthetic process	GO_BiologicalProcess_23.05.2012_16h07	0.026	0.026	0.026	0.026	[5, 6, 7, 8, 9]	Group93	14.2857	2	Specific for Cluster #1	[YJL101C, YOL049W]	[]	100	0	[YJL101C, YOL049W]
GO:0006895	Golgi to endosome transport	GO_BiologicalProcess_23.05.2012_16h07	0.011	0.011	0.011	0.011	[5, 6, 7]	Group94	8.33333	4	Specific for Cluster #2	[YMR292W]	[YDR141C, YGL095C, YJL004C]	25	75	[YDR141C, YGL095C, YJL004C, YMR292W]
GO:0009051	pentose-phosphate shunt, oxidative branch	GO_BiologicalProcess_23.05.2012_16h07	0.037	0.037	0.037	0.037	[5, 6, 8, 9, 10, 11, 12, 13]	Group95	11.7647	2	Specific for Cluster #2	[]	[YHR163W, YHR183W]	0	100	[YHR163W, YHR183W]
GO:0009052	pentose-phosphate shunt, non-oxidative branch	GO_BiologicalProcess_23.05.2012_16h07	0.071	0.071	0.071	0.071	[5, 6, 8, 9, 10, 11, 12, 13]	Group96	25	1	Specific for Cluster #2	[]	[YOR095C]	0	100	[YOR095C]
GO:0009106	lipoate metabolic process	GO_BiologicalProcess_23.05.2012_16h07	0.15	0.15	0.15	0.15	[4, 5, 6, 8]	Group97	11.1111	1	Specific for Cluster #1	[YKL192C]	[]	100	0	[YKL192C]
GO:0009107	lipoate biosynthetic process	GO_BiologicalProcess_23.05.2012_16h07	0.15	0.15	0.15	0.15	[5, 6, 7, 8, 9]	Group97	11.1111	1	Specific for Cluster #1	[YKL192C]	[]	100	0	[YKL192C]

## Sheet: PB_phase
GOID	GOTerm	Ontology Source	Term PValue	Term PValue Corrected with None	Group PValue	Group PValue Corrected with None	GOLevels	GOGroups	% Associated Genes	Nr. Genes	Cluster	Genes Cluster #1 (upregulated)	Genes Cluster #2 (downregulated)	%Genes Cluster #1	%Genes Cluster #2	Associated Genes Found
GO:0000038	very long-chain fatty acid metabolic process	GO_BiologicalProcess_23.05.2012_16h07	0.031	0.031	0.031	0.031	[5, 6, 8]	Group0	16.6667	1	Specific for Cluster #1	[YDL015C]	[]	100	0	[YDL015C]
GO:0006167	AMP biosynthetic process	GO_BiologicalProcess_23.05.2012_16h07	0.0012	0.0012	0.0032	0.0032	[9, 10, 11, 12]	Group1	20	2	Specific for Cluster #2	[]	[YJR105W, YML022W]	0	100	[YJR105W, YML022W]
GO:0006189	'de novo' IMP biosynthetic process	GO_BiologicalProcess_23.05.2012_16h07	0.014	0.014	0.0032	0.0032	[10, 11, 12, 13]	Group1	5.88235	2	Specific for Cluster #2	[]	[YGL234W, YOR128C]	0	100	[YGL234W, YOR128C]
GO:0006144	purine base metabolic process	GO_BiologicalProcess_23.05.2012_16h07	0.00067	0.00067	0.0032	0.0032	[5, 6, 7]	Group1	5.40541	4	Specific for Cluster #2	[]	[YGL234W, YJR105W, YML022W, YOR128C]	0	100	[YGL234W, YJR105W, YML022W, YOR128C]
GO:0043174	nucleoside salvage	GO_BiologicalProcess_23.05.2012_16h07	0.011	0.011	0.0032	0.0032	[5, 6, 7, 8]	Group1	6.45161	2	Specific for Cluster #2	[]	[YJR105W, YML022W]	0	100	[YJR105W, YML022W]
GO:0043096	purine base salvage	GO_BiologicalProcess_23.05.2012_16h07	0.087	0.087	0.0032	0.0032	[5, 6, 7, 8, 9]	Group1	5.88235	1	Specific for Cluster #2	[]	[YML022W]	0	100	[YML022W]
GO:0046083	adenine metabolic process	GO_BiologicalProcess_23.05.2012_16h07	0.087	0.087	0.0032	0.0032	[6, 7, 8]	Group1	5.88235	1	Specific for Cluster #2	[]	[YML022W]	0	100	[YML022W]
GO:0046084	adenine biosynthetic process	GO_BiologicalProcess_23.05.2012_16h07	0.072	0.072	0.0032	0.0032	[5, 7, 8, 9]	Group1	7.14286	1	Specific for Cluster #2	[]	[YML022W]	0	100	[YML022W]
GO:0006166	purine ribonucleoside salvage	GO_BiologicalProcess_23.05.2012_16h07	0.011	0.011	0.0032	0.0032	[6, 7, 8, 9, 10]	Group1	6.45161	2	Specific for Cluster #2	[]	[YJR105W, YML022W]	0	100	[YJR105W, YML022W]
GO:0006168	adenine salvage	GO_BiologicalProcess_23.05.2012_16h07	0.057	0.057	0.0032	0.0032	[6, 7, 8, 9, 10]	Group1	9.09091	1	Specific for Cluster #2	[]	[YML022W]	0	100	[YML022W]
GO:0046033	AMP metabolic process	GO_BiologicalProcess_23.05.2012_16h07	0.0012	0.0012	0.0032	0.0032	[8, 9, 10, 11]	Group1	20	2	Specific for Cluster #2	[]	[YJR105W, YML022W]	0	100	[YJR105W, YML022W]
GO:0018344	protein geranylgeranylation	GO_BiologicalProcess_23.05.2012_16h07	0.077	0.077	0.077	0.077	[5, 7]	Group10	6.66667	1	Specific for Cluster #2	[]	[YPR176C]	0	100	[YPR176C]
GO:0000084	S phase of mitotic cell cycle	GO_BiologicalProcess_23.05.2012_16h07	1.2e-06	1.2e-06	7.2e-13	7.2e-13	[5, 6, 7]	Group11	9.375	6	Specific for Cluster #1	[YBR202W, YEL032W, YGL201C, YLR103C, YLR274W, YPR019W]	[]	100	0	[YBR202W, YEL032W, YGL201C, YLR103C, YLR274W, YPR019W]
GO:0022616	DNA strand elongation	GO_BiologicalProcess_23.05.2012_16h07	1.7e-08	1.7e-08	7.2e-13	7.2e-13	[5, 6, 7]	Group11	6.17284	10	Specific for Cluster #1	[YBR087W, YBR088C, YBR202W, YEL032W, YGL201C, YJR068W, YKL113C, YOR033C, YPR019W]	[YJR006W]	90	10	[YBR087W, YBR088C, YBR202W, YEL032W, YGL201C, YJR006W, YJR068W, YKL113C, YOR033C, YPR019W]
GO:0000706	meiotic DNA double-strand break processing	GO_BiologicalProcess_23.05.2012_16h07	0.096	0.096	7.2e-13	7.2e-13	[3, 4, 5, 8, 9, 10]	Group11	5.26316	1	Specific for Cluster #1	[YOR033C]	[]	100	0	[YOR033C]
GO:0000734	gene conversion at mating-type locus, DNA repair synthesis	GO_BiologicalProcess_23.05.2012_16h07	0.057	0.057	7.2e-13	7.2e-13	[3, 4, 5, 6, 7, 8, 9, 10]	Group11	9.09091	1	Specific for Cluster #1	[YKL113C]	[]	100	0	[YKL113C]
GO:0031292	gene conversion at mating-type locus, DNA double-strand break processing	GO_BiologicalProcess_23.05.2012_16h07	0.052	0.052	7.2e-13	7.2e-13	[3, 4, 5, 6, 7, 8, 9, 10]	Group11	10	1	Specific for Cluster #1	[YOR033C]	[]	100	0	[YOR033C]
GO:0000731	DNA synthesis involved in DNA repair	GO_BiologicalProcess_23.05.2012_16h07	0.096	0.096	7.2e-13	7.2e-13	[6, 7, 8]	Group11	5.26316	1	Specific for Cluster #1	[YKL113C]	[]	100	0	[YKL113C]
GO:0000738	DNA catabolic process, exonucleolytic	GO_BiologicalProcess_23.05.2012_16h07	0.096	0.096	7.2e-13	7.2e-13	[6, 7, 8]	Group11	5.26316	1	Specific for Cluster #1	[YOR033C]	[]	100	0	[YOR033C]
GO:0032392	DNA geometric change	GO_BiologicalProcess_23.05.2012_16h07	0.00018	0.00018	7.2e-13	7.2e-13	[6, 7, 8]	Group11	7.54717	4	Specific for Cluster #1	[YBR202W, YGL201C, YPR019W]	[YDR190C]	75	25	[YBR202W, YDR190C, YGL201C, YPR019W]
GO:0006267	pre-replicative complex assembly	GO_BiologicalProcess_23.05.2012_16h07	4.5e-10	4.5e-10	7.2e-13	7.2e-13	[6, 7, 8, 9]	Group11	14.8148	8	Specific for Cluster #1	[YBR202W, YEL032W, YGL201C, YLR103C, YLR274W, YML065W, YPR019W]	[YBR060C]	87.5	12.5	[YBR060C, YBR202W, YEL032W, YGL201C, YLR103C, YLR274W, YML065W, YPR019W]
GO:0006271	DNA strand elongation involved in DNA replication	GO_BiologicalProcess_23.05.2012_16h07	1.5e-07	1.5e-07	7.2e-13	7.2e-13	[6, 7, 8, 9]	Group11	5.80645	9	Specific for Cluster #1	[YBR087W, YBR088C, YBR202W, YEL032W, YGL201C, YJR068W, YKL113C, YPR019W]	[YJR006W]	88.8889	11.1111	[YBR087W, YBR088C, YBR202W, YEL032W, YGL201C, YJR006W, YJR068W, YKL113C, YPR019W]
GO:0006286	base-excision repair, base-free sugar-phosphate removal	GO_BiologicalProcess_23.05.2012_16h07	0.015	0.015	7.2e-13	7.2e-13	[6, 7, 8, 9]	Group11	33.3333	1	Specific for Cluster #1	[YKL113C]	[]	100	0	[YKL113C]
GO:0031860	telomeric 3' overhang formation	GO_BiologicalProcess_23.05.2012_16h07	0.036	0.036	7.2e-13	7.2e-13	[6, 7, 8, 9]	Group11	14.2857	1	Specific for Cluster #1	[YOR033C]	[]	100	0	[YOR033C]
GO:0000729	DNA double-strand break processing	GO_BiologicalProcess_23.05.2012_16h07	0.096	0.096	7.2e-13	7.2e-13	[7, 8, 9]	Group11	5.26316	1	Specific for Cluster #1	[YOR033C]	[]	100	0	[YOR033C]
GO:0032508	DNA duplex unwinding	GO_BiologicalProcess_23.05.2012_16h07	0.0001	0.0001	7.2e-13	7.2e-13	[7, 8, 9]	Group11	8.69565	4	Specific for Cluster #1	[YBR202W, YGL201C, YPR019W]	[YDR190C]	75	25	[YBR202W, YDR190C, YGL201C, YPR019W]
GO:0006268	DNA unwinding involved in replication	GO_BiologicalProcess_23.05.2012_16h07	0.00066	0.00066	7.2e-13	7.2e-13	[7, 8, 9, 10]	Group11	9.375	3	Specific for Cluster #1	[YBR202W, YGL201C, YPR019W]	[]	100	0	[YBR202W, YGL201C, YPR019W]
GO:0000727	double-strand break repair via break-induced replication	GO_BiologicalProcess_23.05.2012_16h07	1.3e-08	1.3e-08	7.2e-13	7.2e-13	[8, 9, 10]	Group11	9.7561	8	Specific for Cluster #1	[YBR202W, YEL032W, YGL201C, YLR103C, YLR274W, YOL146W, YPR019W]	[YMR284W]	87.5	12.5	[YBR202W, YEL032W, YGL201C, YLR103C, YLR274W, YMR284W, YOL146W, YPR019W]
GO:0030037	actin filament reorganization involved in cell cycle	GO_BiologicalProcess_23.05.2012_16h07	0.077	0.077	0.077	0.077	[3, 4, 5, 8]	Group12	6.66667	1	Specific for Cluster #1	[YFL039C]	[]	100	0	[YFL039C]
GO:0030497	fatty acid elongation	GO_BiologicalProcess_23.05.2012_16h07	0.062	0.062	0.062	0.062	[5, 6, 7, 8, 9]	Group13	8.33333	1	Specific for Cluster #1	[YJL196C]	[]	100	0	[YJL196C]
GO:0019368	fatty acid elongation, unsaturated fatty acid	GO_BiologicalProcess_23.05.2012_16h07	0.015	0.015	0.062	0.062	[6, 7, 8, 9, 10]	Group13	33.3333	1	Specific for Cluster #1	[YJL196C]	[]	100	0	[YJL196C]
GO:0035753	maintenance of DNA trinucleotide repeats	GO_BiologicalProcess_23.05.2012_16h07	0.062	0.062	0.062	0.062	[6, 7, 8]	Group14	8.33333	1	Specific for Cluster #1	[YCL016C]	[]	100	0	[YCL016C]
GO:0042262	DNA protection	GO_BiologicalProcess_23.05.2012_16h07	0.015	0.015	0.015	0.015	[4, 5, 6, 7]	Group15	33.3333	1	Specific for Cluster #1	[YML028W]	[]	100	0	[YML028W]
GO:0045338	farnesyl diphosphate metabolic process	GO_BiologicalProcess_23.05.2012_16h07	0.062	0.062	0.1	0.1	[4, 5, 6, 7]	Group16	8.33333	1	Specific for Cluster #1	[YJL167W]	[]	100	0	[YJL167W]
GO:0006695	cholesterol biosynthetic process	GO_BiologicalProcess_23.05.2012_16h07	0.062	0.062	0.1	0.1	[6, 7]	Group16	8.33333	1	Specific for Cluster #1	[YJL167W]	[]	100	0	[YJL167W]
GO:0045337	farnesyl diphosphate biosynthetic process	GO_BiologicalProcess_23.05.2012_16h07	0.062	0.062	0.1	0.1	[5, 6, 7, 8]	Group16	8.33333	1	Specific for Cluster #1	[YJL167W]	[]	100	0	[YJL167W]
GO:0000710	meiotic mismatch repair	GO_BiologicalProcess_23.05.2012_16h07	0.0035	0.0035	0.0035	0.0035	[3, 4, 5, 6, 7, 8, 9]	Group17	5.26316	3	Specific for Cluster #1	[YBR088C, YDR097C, YMR167W]	[]	100	0	[YBR088C, YDR097C, YMR167W]
GO:0000713	meiotic heteroduplex formation	GO_BiologicalProcess_23.05.2012_16h07	0.015	0.015	0.0035	0.0035	[3, 4, 5, 6, 7, 8, 9]	Group17	33.3333	1	Specific for Cluster #1	[YMR167W]	[]	100	0	[YMR167W]
GO:0045861	negative regulation of proteolysis	GO_BiologicalProcess_23.05.2012_16h07	0.057	0.057	0.057	0.057	[5, 6, 7, 8]	Group18	9.09091	1	Specific for Cluster #2	[]	[YGR132C]	0	100	[YGR132C]
GO:0006172	ADP biosynthetic process	GO_BiologicalProcess_23.05.2012_16h07	0.041	0.041	0.041	0.041	[9, 10, 11, 12]	Group19	12.5	1	Specific for Cluster #2	[]	[YDR226W]	0	100	[YDR226W]
GO:0009135	purine nucleoside diphosphate metabolic process	GO_BiologicalProcess_23.05.2012_16h07	0.041	0.041	0.041	0.041	[6, 7, 8, 9]	Group19	12.5	1	Specific for Cluster #2	[]	[YDR226W]	0	100	[YDR226W]
GO:0009185	ribonucleoside diphosphate metabolic process	GO_BiologicalProcess_23.05.2012_16h07	0.041	0.041	0.041	0.041	[7, 8, 9]	Group19	12.5	1	Specific for Cluster #2	[]	[YDR226W]	0	100	[YDR226W]
GO:0009136	purine nucleoside diphosphate biosynthetic process	GO_BiologicalProcess_23.05.2012_16h07	0.041	0.041	0.041	0.041	[7, 8, 9, 10]	Group19	12.5	1	Specific for Cluster #2	[]	[YDR226W]	0	100	[YDR226W]
GO:0009179	purine ribonucleoside diphosphate metabolic process	GO_BiologicalProcess_23.05.2012_16h07	0.041	0.041	0.041	0.041	[7, 8, 9, 10]	Group19	12.5	1	Specific for Cluster #2	[]	[YDR226W]	0	100	[YDR226W]
GO:0009188	ribonucleoside diphosphate biosynthetic process	GO_BiologicalProcess_23.05.2012_16h07	0.041	0.041	0.041	0.041	[7, 8, 9, 10]	Group19	12.5	1	Specific for Cluster #2	[]	[YDR226W]	0	100	[YDR226W]
GO:0009180	purine ribonucleoside diphosphate biosynthetic process	GO_BiologicalProcess_23.05.2012_16h07	0.041	0.041	0.041	0.041	[8, 9, 10, 11]	Group19	12.5	1	Specific for Cluster #2	[]	[YDR226W]	0	100	[YDR226W]
GO:0046031	ADP metabolic process	GO_BiologicalProcess_23.05.2012_16h07	0.041	0.041	0.041	0.041	[8, 9, 10, 11]	Group19	12.5	1	Specific for Cluster #2	[]	[YDR226W]	0	100	[YDR226W]
GO:0000379	tRNA-type intron splice site recognition and cleavage	GO_BiologicalProcess_23.05.2012_16h07	0.062	0.062	0.062	0.062	[5, 6, 7, 8, 9, 10, 11]	Group2	8.33333	1	Specific for Cluster #2	[]	[YLR105C]	0	100	[YLR105C]
GO:0009177	pyrimidine deoxyribonucleoside monophosphate biosynthetic process	GO_BiologicalProcess_23.05.2012_16h07	0.031	0.031	0.031	0.031	[8, 9, 10, 11, 12]	Group20	16.6667	1	Specific for Cluster #1	[YOR074C]	[]	100	0	[YOR074C]
GO:0046073	dTMP metabolic process	GO_BiologicalProcess_23.05.2012_16h07	0.031	0.031	0.031	0.031	[8, 9, 10, 11, 12]	Group20	16.6667	1	Specific for Cluster #1	[YOR074C]	[]	100	0	[YOR074C]
GO:0006231	dTMP biosynthetic process	GO_BiologicalProcess_23.05.2012_16h07	0.031	0.031	0.031	0.031	[9, 10, 11, 12, 13]	Group20	16.6667	1	Specific for Cluster #1	[YOR074C]	[]	100	0	[YOR074C]
GO:0009162	deoxyribonucleoside monophosphate metabolic process	GO_BiologicalProcess_23.05.2012_16h07	0.031	0.031	0.031	0.031	[7, 8, 9]	Group20	16.6667	1	Specific for Cluster #1	[YOR074C]	[]	100	0	[YOR074C]
GO:0009157	deoxyribonucleoside monophosphate biosynthetic process	GO_BiologicalProcess_23.05.2012_16h07	0.031	0.031	0.031	0.031	[7, 8, 9, 10]	Group20	16.6667	1	Specific for Cluster #1	[YOR074C]	[]	100	0	[YOR074C]
GO:0009176	pyrimidine deoxyribonucleoside monophosphate metabolic process	GO_BiologicalProcess_23.05.2012_16h07	0.031	0.031	0.031	0.031	[7, 8, 9, 10, 11]	Group20	16.6667	1	Specific for Cluster #1	[YOR074C]	[]	100	0	[YOR074C]
GO:0046475	glycerophospholipid catabolic process	GO_BiologicalProcess_23.05.2012_16h07	0.062	0.062	0.062	0.062	[5, 6, 7]	Group21	8.33333	1	Specific for Cluster #2	[]	[YPL206C]	0	100	[YPL206C]
GO:0034478	phosphatidylglycerol catabolic process	GO_BiologicalProcess_23.05.2012_16h07	0.015	0.015	0.062	0.062	[6, 7, 8]	Group21	33.3333	1	Specific for Cluster #2	[]	[YPL206C]	0	100	[YPL206C]
GO:0051316	attachment of spindle microtubules to kinetochore involved in meiotic chromosome segregation	GO_BiologicalProcess_23.05.2012_16h07	0.015	0.015	0.015	0.015	[3, 4, 5, 6, 7, 8, 9, 10]	Group22	33.3333	1	Specific for Cluster #2	[]	[YPL204W]	0	100	[YPL204W]
GO:0051455	attachment of spindle microtubules to kinetochore involved in homologous chromosome segregation	GO_BiologicalProcess_23.05.2012_16h07	0.015	0.015	0.015	0.015	[4, 5, 6, 7, 8, 9, 10, 11]	Group22	33.3333	1	Specific for Cluster #2	[]	[YPL204W]	0	100	[YPL204W]
GO:0000715	nucleotide-excision repair, DNA damage recognition	GO_BiologicalProcess_23.05.2012_16h07	0.096	0.096	0.096	0.096	[6, 7, 8, 9]	Group23	5.26316	1	Specific for Cluster #2	[]	[YEL037C]	0	100	[YEL037C]
GO:0006422	aspartyl-tRNA aminoacylation	GO_BiologicalProcess_23.05.2012_16h07	0.057	0.057	0.057	0.057	[6, 7, 9, 10, 11]	Group24	9.09091	1	Specific for Cluster #1	[YPL104W]	[]	100	0	[YPL104W]
GO:0070146	mitochondrial aspartyl-tRNA aminoacylation	GO_BiologicalProcess_23.05.2012_16h07	0.015	0.015	0.057	0.057	[6, 7, 8, 10, 11, 12]	Group24	33.3333	1	Specific for Cluster #1	[YPL104W]	[]	100	0	[YPL104W]
GO:0070601	centromeric sister chromatid cohesion	GO_BiologicalProcess_23.05.2012_16h07	0.015	0.015	0.096	0.096	[4, 5, 7]	Group25	33.3333	1	Specific for Cluster #1	[YOR014W]	[]	100	0	[YOR014W]
GO:0051754	meiotic sister chromatid cohesion, centromeric	GO_BiologicalProcess_23.05.2012_16h07	0.015	0.015	0.096	0.096	[5, 6, 7, 8, 9, 10]	Group25	33.3333	1	Specific for Cluster #1	[YOR014W]	[]	100	0	[YOR014W]
GO:0031578	mitotic cell cycle spindle orientation checkpoint	GO_BiologicalProcess_23.05.2012_16h07	0.096	0.096	0.096	0.096	[7, 8, 9, 10, 11]	Group25	5.26316	1	Specific for Cluster #1	[YOR014W]	[]	100	0	[YOR014W]
GO:0070940	dephosphorylation of RNA polymerase II C-terminal domain	GO_BiologicalProcess_23.05.2012_16h07	0.062	0.062	0.062	0.062	[7, 8, 9, 10, 11]	Group26	8.33333	1	Specific for Cluster #2	[]	[YMR277W]	0	100	[YMR277W]
GO:0006419	alanyl-tRNA aminoacylation	GO_BiologicalProcess_23.05.2012_16h07	0.036	0.036	0.036	0.036	[6, 7, 9, 10, 11]	Group3	14.2857	1	Specific for Cluster #2	[]	[YNL040W]	0	100	[YNL040W]
GO:0006429	leucyl-tRNA aminoacylation	GO_BiologicalProcess_23.05.2012_16h07	0.031	0.031	0.031	0.031	[6, 7, 9, 10, 11]	Group4	16.6667	1	Specific for Cluster #2	[]	[YLR382C]	0	100	[YLR382C]
GO:0006431	methionyl-tRNA aminoacylation	GO_BiologicalProcess_23.05.2012_16h07	0.057	0.057	0.057	0.057	[6, 7, 9, 10, 11]	Group5	9.09091	1	Specific for Cluster #2	[]	[YGR171C]	0	100	[YGR171C]
GO:0009051	pentose-phosphate shunt, oxidative branch	GO_BiologicalProcess_23.05.2012_16h07	0.087	0.087	0.087	0.087	[5, 6, 8, 9, 10, 11, 12, 13]	Group6	5.88235	1	Specific for Cluster #2	[]	[YHR183W]	0	100	[YHR183W]
GO:0000390	spliceosomal complex disassembly	GO_BiologicalProcess_23.05.2012_16h07	0.096	0.096	0.096	0.096	[6, 7, 8, 9, 10, 11, 12]	Group7	5.26316	1	Specific for Cluster #2	[]	[YGL120C]	0	100	[YGL120C]
GO:0009052	pentose-phosphate shunt, non-oxidative branch	GO_BiologicalProcess_23.05.2012_16h07	0.021	0.021	0.021	0.021	[5, 6, 8, 9, 10, 11, 12, 13]	Group8	25	1	Specific for Cluster #2	[]	[YOR095C]	0	100	[YOR095C]
GO:0017183	peptidyl-diphthamide biosynthetic process from peptidyl-histidine	GO_BiologicalProcess_23.05.2012_16h07	0.1	0.1	0.1	0.1	[4, 9]	Group9	5	1	Specific for Cluster #2	[]	[YKL191W]	0	100	[YKL191W]
GO:0017182	peptidyl-diphthamide metabolic process	GO_BiologicalProcess_23.05.2012_16h07	0.1	0.1	0.1	0.1	[8]	Group9	5	1	Specific for Cluster #2	[]	[YKL191W]	0	100	[YKL191W]
